# Supplementary material for: Positive-Unlabeled Learning for inferring drug interactions based on heterogeneous attributes
Source: BMC Bioinformatics. 2017 Mar 1;18:140. doi: 10.1186/s12859-017-1546-7 (PMC5333429; doi:10.1186/s12859-017-1546-7)
Supplement: Additional file 3 — The inferred 5892 DDIs and their probabilities. This is Supplementary Table 2. (XLSX 134 kb) [file 12859_2017_1546_MOESM3_ESM.xlsx]

## Sheet: Table 1
DDI_ID	Drug 1	Drug 2	Probability
107599	Indinavir	Saquinavir	1
107593	Indinavir	Ritonavir	1
131839	Nelfinavir	Saquinavir	0.9996
13807	Amprenavir	Ritonavir	0.9995
149276	Topiramate	Voriconazole	0.9995
30185	Bosentan	Enalapril	0.9995
114065	Leflunomide	Topiramate	0.9995
149281	Topiramate	Ziprasidone	0.9995
148982	Tizanidine	Topiramate	0.9995
147218	Sufentanil	Tramadol	0.9995
95452	Foscarnet	Phenytoin	0.9995
110324	Itraconazole	Minocycline	0.9995
16781	Arsenic Trioxide	Methylphenidate	0.9995
116326	Lisinopril	Phenytoin	0.9995
95502	Foscarnet	Risperidone	0.9995
124185	Methylphenidate	Tizanidine	0.9994
132823	Nifedipine	Topiramate	0.9994
40097	Carvedilol	Topiramate	0.9994
124122	Methylphenidate	Quinine	0.9994
54434	Cimetidine	Nizatidine	0.9994
110496	Itraconazole	Tizanidine	0.9994
127371	Mirtazapine	Phenytoin	0.9994
116466	Lisinopril	Zolpidem	0.9994
59094	Clozapine	Lisinopril	0.9994
106574	Imipramine	Methadone	0.9994
16233	Aripiprazole	Lisinopril	0.9994
16477	Aripiprazole	Valproic Acid	0.9994
30303	Bosentan	Lisinopril	0.9994
127018	Minocycline	Sulfisoxazole	0.9994
113066	Lamotrigine	Methylphenidate	0.9994
143173	Propafenone	Topiramate	0.9994
16809	Arsenic Trioxide	Nabilone	0.9994
147691	Tacrolimus	Tizanidine	0.9994
64979	Desipramine	Methadone	0.9994
95503	Foscarnet	Ritonavir	0.9994
137590	Pantoprazole	Tizanidine	0.9993
97663	Galantamine	Mirtazapine	0.9993
129837	Mycophenolic Acid	Phenytoin	0.9993
30335	Bosentan	Methylphenidate	0.9993
95266	Foscarnet	Fosphenytoin	0.9993
82117	Esmolol	Methadone	0.9993
129340	Morphine	Topiramate	0.9993
124013	Methylphenidate	Minocycline	0.9993
78788	Enalapril	Minocycline	0.9993
139926	Phenytoin	Selegiline	0.9993
30547	Bosentan	Valproic Acid	0.9993
96535	Fosphenytoin	Tizanidine	0.9993
95312	Foscarnet	Itraconazole	0.9993
80837	Eprosartan	Topiramate	0.9993
78020	Efavirenz	Methylphenidate	0.9993
70840	Diltiazem	Topiramate	0.9993
16519	Arsenic Trioxide	Bosentan	0.9993
129936	Mycophenolic Acid	Tizanidine	0.9993
95173	Formoterol	Ritonavir	0.9993
110270	Itraconazole	Leflunomide	0.9993
30527	Bosentan	Topiramate	0.9993
122703	Methadone	Pentoxifylline	0.9993
78212	Efavirenz	Topiramate	0.9993
125148	Metoprolol	Nabilone	0.9993
119999	Mefloquine	Methadone	0.9993
34403	Bupropion	Topiramate	0.9993
110353	Itraconazole	Nifedipine	0.9993
146522	Selegiline	Topiramate	0.9993
102145	Haloperidol	Pentoxifylline	0.9993
107469	Indinavir	Minocycline	0.9993
38028	Carbamazepine	Metoprolol	0.9993
97785	Galantamine	Ritonavir	0.9992
113873	Leflunomide	Methylphenidate	0.9992
30415	Bosentan	Pentoxifylline	0.9992
63938	Delavirdine	Topiramate	0.9992
96318	Fosphenytoin	Lisinopril	0.9992
87517	Felodipine	Methadone	0.9992
97676	Galantamine	Nabilone	0.9992
122831	Methadone	Trimipramine	0.9992
137787	Paricalcitol	Zolpidem	0.9992
95592	Foscarnet	Zolpidem	0.9992
95366	Foscarnet	Methylphenidate	0.9992
122736	Methadone	Propofol	0.9992
116432	Lisinopril	Topiramate	0.9992
139042	Pentoxifylline	Quinine	0.9992
55448	Ciprofloxacin	Topiramate	0.9992
116435	Lisinopril	Tramadol	0.9992
131507	Naproxen	Topiramate	0.9992
38023	Carbamazepine	Methylphenidate	0.9992
124192	Methylphenidate	Topiramate	0.9992
26090	Betaxolol	Topiramate	0.9992
94602	Fluvoxamine	Foscarnet	0.9992
146357	Saquinavir	Topiramate	0.9992
77917	Efavirenz	Foscarnet	0.9992
48368	Celecoxib	Topiramate	0.9992
97840	Galantamine	Topiramate	0.9992
129943	Mycophenolic Acid	Topiramate	0.9992
25984	Betaxolol	Phenytoin	0.9992
148985	Tizanidine	Tramadol	0.9992
59196	Clozapine	Pantoprazole	0.9992
124162	Methylphenidate	Tadalafil	0.9992
124226	Methylphenidate	Zolpidem	0.9992
23590	Baclofen	Topiramate	0.9992
141356	Pramipexole	Voriconazole	0.9992
95504	Foscarnet	Rivastigmine	0.9992
106471	Imatinib	Tizanidine	0.9992
144487	Rabeprazole	Topiramate	0.9992
113209	Lamotrigine	Saquinavir	0.9992
98162	Ganciclovir	Topiramate	0.9992
110326	Itraconazole	Mirtazapine	0.9992
117786	Losartan	Minocycline	0.9992
105292	Ibuprofen	Topiramate	0.9992
135308	Omeprazole	Topiramate	0.9992
95262	Formoterol	Zolpidem	0.9992
114016	Leflunomide	Saquinavir	0.9992
116385	Lisinopril	Selegiline	0.9992
38994	Carnitine	Nabilone	0.9992
70833	Diltiazem	Tizanidine	0.9992
122739	Methadone	Protriptyline	0.9991
110308	Itraconazole	Methotrexate	0.9991
146385	Saquinavir	Voriconazole	0.9991
16336	Aripiprazole	Paricalcitol	0.9991
113521	Lansoprazole	Tizanidine	0.9991
110279	Itraconazole	Lisinopril	0.9991
96575	Fosphenytoin	Ziprasidone	0.9991
48272	Celecoxib	Pramipexole	0.9991
124220	Methylphenidate	Voriconazole	0.9991
40048	Carvedilol	Saquinavir	0.9991
63746	Delavirdine	Methylphenidate	0.9991
75046	Doxazosin	Phenytoin	0.9991
126982	Minocycline	Quinine	0.9991
12095	Amoxapine	Methadone	0.9991
30087	Bosentan	Captopril	0.9991
92890	Fluoxetine	Topiramate	0.9991
95381	Foscarnet	Mirtazapine	0.9991
30288	Bosentan	Labetalol	0.9991
106660	Imipramine	Pentoxifylline	0.9991
116351	Lisinopril	Propafenone	0.9991
139258	Perindopril	Topiramate	0.9991
124137	Methylphenidate	Ritonavir	0.9991
37920	Carbamazepine	Foscarnet	0.9991
59109	Clozapine	Mefloquine	0.9991
110380	Itraconazole	Pamidronate	0.9991
122675	Methadone	Nortriptyline	0.9991
17007	Arsenic Trioxide	Zolpidem	0.9991
110536	Itraconazole	Ziprasidone	0.9991
59206	Clozapine	Pentoxifylline	0.9991
37104	Captopril	Nabilone	0.9991
19027	Atorvastatin	Topiramate	0.9991
95551	Foscarnet	Tizanidine	0.9991
146350	Saquinavir	Tizanidine	0.9991
79718	Entacapone	Topiramate	0.9991
95221	Formoterol	Tizanidine	0.9991
97123	Furosemide	Quinine	0.9991
96254	Fosphenytoin	Galantamine	0.9991
122792	Methadone	Terazosin	0.9991
106283	Imatinib	Methotrexate	0.9991
118038	Lovastatin	Minocycline	0.9991
126906	Minocycline	Nitrofurantoin	0.9991
36601	Capecitabine	Methylphenidate	0.9991
8027	Amifostine	Sufentanil	0.9991
30405	Bosentan	Pantoprazole	0.9991
6271	Allopurinol	Methylphenidate	0.9991
113349	Lansoprazole	Minocycline	0.9991
30341	Bosentan	Metronidazole	0.9991
129535	Moxifloxacin	Tizanidine	0.9991
144692	Ramipril	Topiramate	0.9991
139993	Phenytoin	Valproic Acid	0.9991
95446	Foscarnet	Pentoxifylline	0.9991
118356	Loxapine	Pentoxifylline	0.9991
14091	Anagrelide	Fosphenytoin	0.9991
67430	Diazoxide	Methadone	0.9991
16016	Aripiprazole	Capecitabine	0.9991
75152	Doxazosin	Topiramate	0.9991
97594	Galantamine	Itraconazole	0.9991
137647	Paricalcitol	Phenytoin	0.9991
38093	Carbamazepine	Pantoprazole	0.9991
116379	Lisinopril	Ropinirole	0.9991
16161	Aripiprazole	Formoterol	0.9991
6408	Allopurinol	Ritonavir	0.9991
30081	Bosentan	Bupropion	0.9991
36827	Capecitabine	Zolpidem	0.9991
145831	Ritonavir	Tizanidine	0.9991
16162	Aripiprazole	Foscarnet	0.9991
99961	Glimepiride	Pentoxifylline	0.9991
149772	Valproic Acid	Zolpidem	0.9991
110447	Itraconazole	Risperidone	0.999
95509	Foscarnet	Saquinavir	0.999
7930	Amifostine	Ondansetron	0.999
18731	Atorvastatin	Formoterol	0.999
130132	Nabilone	Timolol	0.999
142940	Progesterone	Topiramate	0.999
63842	Delavirdine	Pramipexole	0.999
137697	Paricalcitol	Risperidone	0.999
94848	Fluvoxamine	Saquinavir	0.999
97510	Gabapentin	Tizanidine	0.999
144278	Quinapril	Topiramate	0.999
127428	Mirtazapine	Saquinavir	0.999
59197	Clozapine	Paricalcitol	0.999
124109	Methylphenidate	Progesterone	0.999
28951	Bisoprolol	Phenytoin	0.999
147732	Tacrolimus	Zolpidem	0.999
7861	Amifostine	Mepivacaine	0.999
63692	Delavirdine	Itraconazole	0.999
148190	Terazosin	Topiramate	0.999
145838	Ritonavir	Topiramate	0.999
96421	Fosphenytoin	Paricalcitol	0.999
6268	Allopurinol	Methotrexate	0.999
59921	Cyclobenzaprine	Itraconazole	0.999
15976	Aripiprazole	Arsenic Trioxide	0.999
67516	Diazoxide	Pentoxifylline	0.999
139904	Phenytoin	Rabeprazole	0.999
22112	Azithromycin	Zolpidem	0.999
124024	Methylphenidate	Morphine	0.999
129977	Mycophenolic Acid	Zolpidem	0.999
78803	Enalapril	Nabilone	0.999
16867	Arsenic Trioxide	Phenytoin	0.999
123528	Methotrexate	Valproic Acid	0.999
106478	Imatinib	Topiramate	0.999
65065	Desipramine	Pentoxifylline	0.999
120018	Mefloquine	Minocycline	0.999
16924	Arsenic Trioxide	Saquinavir	0.999
124138	Methylphenidate	Rivastigmine	0.999
127446	Mirtazapine	Tacrolimus	0.999
97759	Galantamine	Propafenone	0.999
38247	Carbamazepine	Zidovudine	0.999
127505	Mirtazapine	Voriconazole	0.999
16861	Arsenic Trioxide	Pentoxifylline	0.999
139152	Perindopril	Phenytoin	0.999
7856	Amifostine	Mefloquine	0.999
94673	Fluvoxamine	Lisinopril	0.999
134859	Olanzapine	Phenytoin	0.999
26083	Betaxolol	Tizanidine	0.999
127030	Minocycline	Terbinafine	0.999
75145	Doxazosin	Tizanidine	0.999
37927	Carbamazepine	Galantamine	0.999
48319	Celecoxib	Saquinavir	0.999
10536	Amiodarone	Minocycline	0.999
110457	Itraconazole	Sertraline	0.999
39918	Carvedilol	Minocycline	0.999
95511	Foscarnet	Selegiline	0.999
124080	Methylphenidate	Pentoxifylline	0.999
55776	Citalopram	Phenytoin	0.999
130030	Nabilone	Pentoxifylline	0.999
78861	Enalapril	Phenytoin	0.999
78721	Enalapril	Itraconazole	0.999
21687	Azithromycin	Clozapine	0.999
146391	Saquinavir	Zolpidem	0.999
30406	Bosentan	Paricalcitol	0.999
110316	Itraconazole	Metoprolol	0.999
95394	Foscarnet	Nabilone	0.999
93371	Flurbiprofen	Methylphenidate	0.999
116253	Lisinopril	Minocycline	0.999
36786	Capecitabine	Tizanidine	0.999
126957	Minocycline	Pravastatin	0.999
118105	Lovastatin	Pentoxifylline	0.999
63761	Delavirdine	Mirtazapine	0.999
16115	Aripiprazole	Enalapril	0.999
8000	Amifostine	Remifentanil	0.999
113910	Leflunomide	Nelfinavir	0.999
75916	Doxorubicin	Tizanidine	0.999
135507	Ondansetron	Warfarin	0.999
125567	Metronidazole	Zolpidem	0.999
38103	Carbamazepine	Pentoxifylline	0.999
126229	Mifepristone	Minoxidil	0.999
97648	Galantamine	Methylphenidate	0.999
110425	Itraconazole	Propranolol	0.999
112161	Ketorolac	Tizanidine	0.9989
11044	Amitriptyline	Methadone	0.9989
146310	Saquinavir	Selegiline	0.9989
93457	Flurbiprofen	Phenytoin	0.9989
6284	Allopurinol	Minocycline	0.9989
137491	Pantoprazole	Phenytoin	0.9989
110480	Itraconazole	Terazosin	0.9989
113422	Lansoprazole	Phenytoin	0.9989
39920	Carvedilol	Mirtazapine	0.9989
105113	Ibuprofen	Minocycline	0.9989
124135	Methylphenidate	Risedronate	0.9989
138096	Paroxetine	Zolpidem	0.9989
126897	Minocycline	Nelfinavir	0.9989
122713	Methadone	Pindolol	0.9989
16224	Aripiprazole	Leflunomide	0.9989
36740	Capecitabine	Ropinirole	0.9989
96036	Fosinopril	Minocycline	0.9989
85761	Etoposide	Minocycline	0.9989
58976	Clozapine	Enalapril	0.9989
37919	Carbamazepine	Formoterol	0.9989
96215	Fosinopril	Topiramate	0.9989
127341	Mirtazapine	Omeprazole	0.9989
17804	Atenolol	Methadone	0.9989
124069	Methylphenidate	Pamidronate	0.9989
127497	Mirtazapine	Valproic Acid	0.9989
134916	Olanzapine	Saquinavir	0.9989
110456	Itraconazole	Selegiline	0.9989
120191	Mefloquine	Tobramycin	0.9989
131738	Nelfinavir	Nifedipine	0.9989
126902	Minocycline	Nifedipine	0.9989
59153	Clozapine	Mycophenolic Acid	0.9989
6217	Allopurinol	Itraconazole	0.9989
59237	Clozapine	Propafenone	0.9989
48176	Celecoxib	Methylphenidate	0.9989
117770	Losartan	Methotrexate	0.9989
147827	Tamoxifen	Topiramate	0.9989
6308	Allopurinol	Nelfinavir	0.9989
10373	Amiodarone	Enalapril	0.9989
12181	Amoxapine	Pentoxifylline	0.9989
145699	Risperidone	Saquinavir	0.9989
137746	Paricalcitol	Tizanidine	0.9989
21624	Azithromycin	Bosentan	0.9989
137956	Paroxetine	Phenytoin	0.9989
124088	Methylphenidate	Pimecrolimus	0.9989
93563	Flurbiprofen	Topiramate	0.9989
110535	Itraconazole	Zidovudine	0.9989
78100	Efavirenz	Pentoxifylline	0.9989
95252	Formoterol	Verapamil	0.9989
90339	Fluconazole	Nabilone	0.9989
106286	Imatinib	Methylphenidate	0.9989
95561	Foscarnet	Tramadol	0.9989
5970	Allopurinol	Amiodarone	0.9989
34297	Bupropion	Phenytoin	0.9989
110449	Itraconazole	Rivastigmine	0.9989
147632	Sumatriptan	Topiramate	0.9989
55902	Citalopram	Valproic Acid	0.9989
126916	Minocycline	Omeprazole	0.9989
106512	Imatinib	Zolpidem	0.9989
120167	Mefloquine	Tadalafil	0.9989
30208	Bosentan	Famotidine	0.9989
30232	Bosentan	Foscarnet	0.9989
146102	Ropivacaine	Topiramate	0.9989
137544	Pantoprazole	Ropinirole	0.9989
30559	Bosentan	Zidovudine	0.9989
135212	Omeprazole	Pramipexole	0.9989
95477	Foscarnet	Propafenone	0.9989
111989	Ketorolac	Minocycline	0.9989
38184	Carbamazepine	Tacrolimus	0.9989
124071	Methylphenidate	Paricalcitol	0.9989
139894	Phenytoin	Propofol	0.9989
25093	Benazepril	Topiramate	0.9989
36616	Capecitabine	Mirtazapine	0.9989
116378	Lisinopril	Rivastigmine	0.9989
144480	Rabeprazole	Tizanidine	0.9989
30340	Bosentan	Metoprolol	0.9989
139146	Pentoxifylline	Zolpidem	0.9989
149005	Tizanidine	Venlafaxine	0.9989
107746	Indomethacin	Methylphenidate	0.9989
59023	Clozapine	Foscarnet	0.9989
23136	Baclofen	Bosentan	0.9988
78895	Enalapril	Quetiapine	0.9988
6230	Allopurinol	Leflunomide	0.9988
78912	Enalapril	Ritonavir	0.9988
37873	Carbamazepine	Enalapril	0.9988
49609	Cetirizine	Phenytoin	0.9988
30473	Bosentan	Rivastigmine	0.9988
139996	Phenytoin	Venlafaxine	0.9988
141273	Pramipexole	Ritonavir	0.9988
19426	Atovaquone	Pentoxifylline	0.9988
123329	Methotrexate	Minocycline	0.9988
70860	Diltiazem	Valproic Acid	0.9988
129992	Nabilone	Nifedipine	0.9988
55833	Citalopram	Saquinavir	0.9988
16271	Aripiprazole	Metronidazole	0.9988
129489	Moxifloxacin	Ropinirole	0.9988
93384	Flurbiprofen	Minocycline	0.9988
94651	Fluvoxamine	Itraconazole	0.9988
126243	Mifepristone	Nabilone	0.9988
95228	Formoterol	Topiramate	0.9988
137631	Pantoprazole	Zolpidem	0.9988
110433	Itraconazole	Quinine	0.9988
138062	Paroxetine	Topiramate	0.9988
137176	Paclitaxel	Phenytoin	0.9988
105100	Ibuprofen	Methylphenidate	0.9988
1102	Acebutolol	Allopurinol	0.9988
130815	Nalbuphine	Pentobarbital	0.9988
37991	Carbamazepine	Lisinopril	0.9988
35164	Cabergoline	Methadone	0.9988
146035	Ropinirole	Valproic Acid	0.9988
117965	Losartan	Topiramate	0.9988
145657	Risedronate	Topiramate	0.9988
14711	Anastrozole	Methylphenidate	0.9988
129234	Morphine	Phenytoin	0.9988
11589	Amlodipine	Minocycline	0.9988
141458	Pravastatin	Topiramate	0.9988
139097	Pentoxifylline	Thioridazine	0.9988
61320	Cysteamine	Pentobarbital	0.9988
16727	Arsenic Trioxide	Itraconazole	0.9988
95586	Foscarnet	Voriconazole	0.9988
16966	Arsenic Trioxide	Tizanidine	0.9988
25802	Betaxolol	Galantamine	0.9988
48262	Celecoxib	Phenytoin	0.9988
110493	Itraconazole	Timolol	0.9988
36697	Capecitabine	Pramipexole	0.9988
6207	Allopurinol	Indinavir	0.9988
78967	Enalapril	Topiramate	0.9988
75340	Doxepin	Methadone	0.9988
124094	Methylphenidate	Piroxicam	0.9988
124186	Methylphenidate	Tobramycin	0.9988
121679	Meropenem	Methadone	0.9988
59269	Clozapine	Saquinavir	0.9988
120682	Meloxicam	Topiramate	0.9988
74906	Doxazosin	Itraconazole	0.9988
87183	Famotidine	Minocycline	0.9988
128100	Modafinil	Tizanidine	0.9988
87476	Felodipine	Labetalol	0.9988
63759	Delavirdine	Minocycline	0.9988
30517	Bosentan	Timolol	0.9988
90391	Fluconazole	Pentoxifylline	0.9988
139002	Pentoxifylline	Perphenazine	0.9988
26124	Betaxolol	Zolpidem	0.9988
130234	Nabumetone	Phenytoin	0.9988
125312	Metoprolol	Topiramate	0.9988
147731	Tacrolimus	Ziprasidone	0.9988
145871	Ritonavir	Ziprasidone	0.9988
116377	Lisinopril	Ritonavir	0.9988
139908	Phenytoin	Remifentanil	0.9988
129887	Mycophenolic Acid	Risperidone	0.9988
59072	Clozapine	Itraconazole	0.9988
93317	Flurbiprofen	Itraconazole	0.9988
30536	Bosentan	Triamcinolone	0.9988
118025	Lovastatin	Methylphenidate	0.9988
59969	Cyclobenzaprine	Methadone	0.9988
126895	Minocycline	Naproxen	0.9988
145858	Ritonavir	Valproic Acid	0.9988
116383	Lisinopril	Saquinavir	0.9988
131401	Naproxen	Phenytoin	0.9988
133978	Nizatidine	Pentoxifylline	0.9988
116255	Lisinopril	Mirtazapine	0.9988
30433	Bosentan	Prazosin	0.9988
116237	Lisinopril	Methotrexate	0.9988
38050	Carbamazepine	Mycophenolic Acid	0.9988
16973	Arsenic Trioxide	Topiramate	0.9988
94995	Formoterol	Leflunomide	0.9988
37073	Captopril	Methotrexate	0.9988
55256	Ciprofloxacin	Methylphenidate	0.9988
130162	Nabilone	Valproic Acid	0.9988
35170	Cabergoline	Methylphenidate	0.9987
14219	Anagrelide	Nabilone	0.9987
127454	Mirtazapine	Terazosin	0.9987
19356	Atovaquone	Mifepristone	0.9987
18835	Atorvastatin	Methylphenidate	0.9987
55271	Ciprofloxacin	Mirtazapine	0.9987
139976	Phenytoin	Tramadol	0.9987
78970	Enalapril	Tramadol	0.9987
147698	Tacrolimus	Topiramate	0.9987
23484	Baclofen	Phenytoin	0.9987
38091	Carbamazepine	Paclitaxel	0.9987
141279	Pramipexole	Saquinavir	0.9987
107409	Indinavir	Labetalol	0.9987
87749	Felodipine	Zolpidem	0.9987
54543	Cimetidine	Sulfisoxazole	0.9987
122822	Methadone	Trazodone	0.9987
29057	Bisoprolol	Topiramate	0.9987
129990	Nabilone	Nicardipine	0.9987
80658	Eprosartan	Minocycline	0.9987
127046	Minocycline	Tobramycin	0.9987
16239	Aripiprazole	Losartan	0.9987
8087	Amifostine	Vancomycin	0.9987
97468	Gabapentin	Saquinavir	0.9987
139029	Pentoxifylline	Progesterone	0.9987
130131	Nabilone	Tiludronate	0.9987
129976	Mycophenolic Acid	Ziprasidone	0.9987
30239	Bosentan	Galantamine	0.9987
39888	Carvedilol	Mefloquine	0.9987
127076	Minocycline	Verapamil	0.9987
36796	Capecitabine	Tramadol	0.9987
95181	Formoterol	Selegiline	0.9987
132688	Nifedipine	Ondansetron	0.9987
117999	Losartan	Zolpidem	0.9987
30370	Bosentan	Naproxen	0.9987
39902	Carvedilol	Methotrexate	0.9987
141621	Prazosin	Zolpidem	0.9987
123316	Methotrexate	Methylphenidate	0.9987
113093	Lamotrigine	Mycophenolic Acid	0.9987
97831	Galantamine	Tiotropium	0.9987
116465	Lisinopril	Ziprasidone	0.9987
37925	Carbamazepine	Furosemide	0.9987
2059	Acetazolamide	Probenecid	0.9987
96488	Fosphenytoin	Rivastigmine	0.9987
7986	Amifostine	Propofol	0.9987
87961	Fenofibrate	Phenytoin	0.9987
124224	Methylphenidate	Zidovudine	0.9987
127365	Mirtazapine	Pentoxifylline	0.9987
146390	Saquinavir	Ziprasidone	0.9987
121204	Mepivacaine	Methadone	0.9987
96493	Fosphenytoin	Saquinavir	0.9987
124143	Methylphenidate	Saquinavir	0.9987
121771	Meropenem	Phenytoin	0.9987
127406	Mirtazapine	Quinapril	0.9987
106481	Imatinib	Tramadol	0.9987
127327	Mirtazapine	Nifedipine	0.9987
95172	Formoterol	Risperidone	0.9987
122763	Methadone	Ropivacaine	0.9987
138013	Paroxetine	Saquinavir	0.9987
95270	Foscarnet	Galantamine	0.9987
119953	Mefenamic Acid	Topiramate	0.9987
16917	Arsenic Trioxide	Risperidone	0.9987
70604	Diltiazem	Lamotrigine	0.9987
140006	Phenytoin	Ziprasidone	0.9987
33724	Bupivacaine	Methadone	0.9987
137328	Pamidronate	Pentoxifylline	0.9987
124017	Methylphenidate	Mitoxantrone	0.9987
116460	Lisinopril	Voriconazole	0.9987
137440	Pamidronate	Topiramate	0.9987
126889	Minocycline	Nabumetone	0.9987
130149	Nabilone	Trazodone	0.9987
78918	Enalapril	Saquinavir	0.9987
21380	Azelastine	Methylphenidate	0.9987
128107	Modafinil	Topiramate	0.9987
92644	Fluoxetine	Itraconazole	0.9987
37089	Captopril	Minocycline	0.9987
70498	Diltiazem	Enalapril	0.9987
1405	Acebutolol	Methadone	0.9987
119774	Mefenamic Acid	Minocycline	0.9987
126930	Minocycline	Pantoprazole	0.9987
32991	Budesonide	Zolpidem	0.9987
7742	Amifostine	Etoposide	0.9987
149811	Venlafaxine	Zolpidem	0.9987
139966	Phenytoin	Tizanidine	0.9987
139162	Perindopril	Pramipexole	0.9987
34431	Bupropion	Voriconazole	0.9987
124062	Methylphenidate	Oxaprozin	0.9987
14277	Anagrelide	Phenytoin	0.9987
124181	Methylphenidate	Tiludronate	0.9987
16438	Aripiprazole	Testosterone	0.9987
124160	Methylphenidate	Sumatriptan	0.9987
79001	Enalapril	Zolpidem	0.9987
134337	Norfloxacin	Phenytoin	0.9987
139297	Perphenazine	Phenytoin	0.9987
59155	Clozapine	Nabumetone	0.9987
70661	Diltiazem	Minocycline	0.9987
126878	Minocycline	Modafinil	0.9987
129333	Morphine	Tizanidine	0.9987
120154	Mefloquine	Sotalol	0.9986
116360	Lisinopril	Quetiapine	0.9986
132826	Nifedipine	Tramadol	0.9986
51828	Chlorpromazine	Pentoxifylline	0.9986
35250	Cabergoline	Pentoxifylline	0.9986
70233	Dihydroergotamine	Mefloquine	0.9986
90294	Fluconazole	Mefloquine	0.9986
112795	Lamivudine	Methylphenidate	0.9986
30328	Bosentan	Metformin	0.9986
94386	Fluvastatin	Minocycline	0.9986
106301	Imatinib	Mirtazapine	0.9986
130021	Nabilone	Paricalcitol	0.9986
93467	Flurbiprofen	Pramipexole	0.9986
30360	Bosentan	Moxifloxacin	0.9986
59975	Cyclobenzaprine	Methylphenidate	0.9986
67493	Diazoxide	Ondansetron	0.9986
26041	Betaxolol	Saquinavir	0.9986
139919	Phenytoin	Rivastigmine	0.9986
79526	Entacapone	Methylphenidate	0.9986
54431	Cimetidine	Nitrofurantoin	0.9986
118492	Loxapine	Verapamil	0.9986
36830	Captopril	Carbamazepine	0.9986
145608	Risedronate	Saquinavir	0.9986
110335	Itraconazole	Morphine	0.9986
124163	Methylphenidate	Tamoxifen	0.9986
16655	Arsenic Trioxide	Felodipine	0.9986
55658	Citalopram	Lisinopril	0.9986
10371	Amiodarone	Efavirenz	0.9986
143097	Propafenone	Protriptyline	0.9986
36877	Captopril	Clozapine	0.9986
22022	Azithromycin	Risperidone	0.9986
139060	Pentoxifylline	Ropivacaine	0.9986
87362	Famotidine	Topiramate	0.9986
146311	Saquinavir	Sertraline	0.9986
60137	Cyclobenzaprine	Tadalafil	0.9986
6487	Allopurinol	Verapamil	0.9986
126879	Minocycline	Moexipril	0.9986
139036	Pentoxifylline	Protriptyline	0.9986
143207	Propafenone	Zolpidem	0.9986
141245	Pramipexole	Progesterone	0.9986
139119	Pentoxifylline	Trazodone	0.9986
96519	Fosphenytoin	Terazosin	0.9986
126997	Minocycline	Ritonavir	0.9986
148013	Telmisartan	Topiramate	0.9986
127084	Minocycline	Zidovudine	0.9986
14383	Anagrelide	Topiramate	0.9986
75923	Doxorubicin	Topiramate	0.9986
124911	Metolazone	Minocycline	0.9986
30484	Bosentan	Sotalol	0.9986
30520	Bosentan	Tizanidine	0.9986
36712	Capecitabine	Propafenone	0.9986
98056	Ganciclovir	Phenytoin	0.9986
6100	Allopurinol	Diltiazem	0.9986
126899	Minocycline	Nevirapine	0.9986
124140	Methylphenidate	Ropivacaine	0.9986
130333	Nabumetone	Tizanidine	0.9986
110024	Isradipine	Methadone	0.9986
85910	Etoposide	Tadalafil	0.9986
139128	Pentoxifylline	Trimipramine	0.9986
25699	Betaxolol	Clozapine	0.9986
70791	Diltiazem	Saquinavir	0.9986
30226	Bosentan	Flurbiprofen	0.9986
59160	Clozapine	Naltrexone	0.9986
87875	Fenofibrate	Methylphenidate	0.9986
36737	Capecitabine	Risperidone	0.9986
1357	Acebutolol	Itraconazole	0.9986
120725	Meperidine	Methadone	0.9986
37997	Carbamazepine	Losartan	0.9986
111714	Ketoprofen	Minocycline	0.9986
125278	Metoprolol	Sulfisoxazole	0.9986
131349	Naltrexone	Zolpidem	0.9986
92841	Fluoxetine	Saquinavir	0.9986
96418	Fosphenytoin	Paclitaxel	0.9986
110432	Itraconazole	Quinapril	0.9986
125240	Metoprolol	Quetiapine	0.9986
97833	Galantamine	Tizanidine	0.9986
126985	Minocycline	Ramipril	0.9986
18848	Atorvastatin	Minocycline	0.9986
97325	Gabapentin	Methylphenidate	0.9986
149002	Tizanidine	Valproic Acid	0.9986
78772	Enalapril	Methotrexate	0.9986
127072	Minocycline	Valproic Acid	0.9986
110503	Itraconazole	Topiramate	0.9986
116268	Lisinopril	Nabilone	0.9986
6228	Allopurinol	Lansoprazole	0.9986
148799	Tiludronate	Tiotropium	0.9986
96562	Fosphenytoin	Valproic Acid	0.9986
110362	Itraconazole	Norfloxacin	0.9986
55636	Citalopram	Itraconazole	0.9986
39942	Carvedilol	Nelfinavir	0.9986
125477	Metronidazole	Risperidone	0.9986
130099	Nabilone	Sotalol	0.9986
110317	Itraconazole	Metronidazole	0.9986
36746	Capecitabine	Selegiline	0.9986
110392	Itraconazole	Perindopril	0.9986
16976	Arsenic Trioxide	Tramadol	0.9986
129890	Mycophenolic Acid	Ropinirole	0.9986
21914	Azithromycin	Nabilone	0.9986
63571	Delavirdine	Didanosine	0.9986
55352	Ciprofloxacin	Pramipexole	0.9986
95122	Formoterol	Phenytoin	0.9986
119761	Mefenamic Acid	Methylphenidate	0.9986
95558	Foscarnet	Topiramate	0.9986
139875	Phenytoin	Piroxicam	0.9986
80545	Eprosartan	Fosphenytoin	0.9986
87456	Felodipine	Imipramine	0.9986
34157	Bupropion	Itraconazole	0.9986
123508	Methotrexate	Topiramate	0.9986
110474	Itraconazole	Tamoxifen	0.9986
59028	Clozapine	Furosemide	0.9986
96486	Fosphenytoin	Risperidone	0.9986
6000	Allopurinol	Betaxolol	0.9986
40129	Carvedilol	Zidovudine	0.9986
127420	Mirtazapine	Risedronate	0.9986
78991	Enalapril	Verapamil	0.9986
30516	Bosentan	Tiludronate	0.9985
59100	Clozapine	Losartan	0.9985
27578	Bicalutamide	Topiramate	0.9985
134506	Nortriptyline	Pentoxifylline	0.9985
124006	Methylphenidate	Metronidazole	0.9985
98155	Ganciclovir	Tizanidine	0.9985
132742	Nifedipine	Propafenone	0.9985
74997	Doxazosin	Nelfinavir	0.9985
70244	Dihydroergotamine	Methadone	0.9985
38205	Carbamazepine	Timolol	0.9985
132701	Nifedipine	Pantoprazole	0.9985
6254	Allopurinol	Mefloquine	0.9985
36547	Capecitabine	Itraconazole	0.9985
144383	Quinine	Topiramate	0.9985
59353	Clozapine	Zonisamide	0.9985
6463	Allopurinol	Topiramate	0.9985
127022	Minocycline	Tadalafil	0.9985
70594	Diltiazem	Itraconazole	0.9985
55594	Citalopram	Galantamine	0.9985
146328	Saquinavir	Tamoxifen	0.9985
36739	Capecitabine	Rivastigmine	0.9985
123459	Methotrexate	Saquinavir	0.9985
78958	Enalapril	Tiotropium	0.9985
97783	Galantamine	Risedronate	0.9985
134696	Ofloxacin	Pramipexole	0.9985
111893	Ketoprofen	Topiramate	0.9985
124029	Methylphenidate	Nabumetone	0.9985
112471	Labetalol	Warfarin	0.9985
127008	Minocycline	Simvastatin	0.9985
111701	Ketoprofen	Methylphenidate	0.9985
70874	Diltiazem	Zolpidem	0.9985
130007	Nabilone	Ondansetron	0.9985
96495	Fosphenytoin	Selegiline	0.9985
124193	Methylphenidate	Topotecan	0.9985
80660	Eprosartan	Mirtazapine	0.9985
25913	Betaxolol	Mirtazapine	0.9985
124097	Methylphenidate	Pravastatin	0.9985
59000	Clozapine	Felodipine	0.9985
7687	Amifostine	Desflurane	0.9985
101422	Guanfacine	Loxapine	0.9985
125144	Metoprolol	Morphine	0.9985
36950	Captopril	Felodipine	0.9985
143206	Propafenone	Ziprasidone	0.9985
87164	Famotidine	Methadone	0.9985
122470	Metformin	Pentoxifylline	0.9985
106313	Imatinib	Mycophenolic Acid	0.9985
132792	Nifedipine	Tacrolimus	0.9985
129293	Morphine	Selegiline	0.9985
96109	Fosinopril	Phenytoin	0.9985
124037	Methylphenidate	Nelfinavir	0.9985
70336	Dihydroergotamine	Phenytoin	0.9985
131500	Naproxen	Tizanidine	0.9985
30136	Bosentan	Clozapine	0.9985
113562	Lansoprazole	Zolpidem	0.9985
59150	Clozapine	Morphine	0.9985
60061	Cyclobenzaprine	Phenytoin	0.9985
130136	Nabilone	Tobramycin	0.9985
129987	Nabilone	Nelfinavir	0.9985
59078	Clozapine	Ketorolac	0.9985
69845	Digoxin	Methadone	0.9985
30127	Bosentan	Ciprofloxacin	0.9985
30138	Bosentan	Cyclobenzaprine	0.9985
30480	Bosentan	Selegiline	0.9985
139088	Pentoxifylline	Teniposide	0.9985
30218	Bosentan	Fludarabine	0.9985
35116	Cabergoline	Itraconazole	0.9985
113341	Lansoprazole	Metoprolol	0.9985
80591	Eprosartan	Itraconazole	0.9985
18850	Atorvastatin	Mirtazapine	0.9985
48191	Celecoxib	Mirtazapine	0.9985
113927	Leflunomide	Olanzapine	0.9985
147752	Tadalafil	Tiludronate	0.9985
58219	Clonidine	Itraconazole	0.9985
6140	Allopurinol	Etoposide	0.9985
145729	Risperidone	Testosterone	0.9985
63575	Delavirdine	Diltiazem	0.9985
26123	Betaxolol	Ziprasidone	0.9985
126911	Minocycline	Norfloxacin	0.9985
35198	Cabergoline	Nabilone	0.9985
146380	Saquinavir	Venlafaxine	0.9985
110492	Itraconazole	Tiludronate	0.9985
113959	Leflunomide	Phenytoin	0.9985
109983	Isradipine	Labetalol	0.9985
124984	Metolazone	Phenytoin	0.9985
124111	Methylphenidate	Propafenone	0.9985
135448	Ondansetron	Tadalafil	0.9985
18549	Atomoxetine	Zolpidem	0.9985
137706	Paricalcitol	Selegiline	0.9985
96365	Fosphenytoin	Mirtazapine	0.9985
67552	Diazoxide	Protriptyline	0.9985
70442	Dihydroergotamine	Topiramate	0.9985
39991	Carvedilol	Phenytoin	0.9985
30325	Bosentan	Meropenem	0.9985
36826	Capecitabine	Ziprasidone	0.9985
106796	Imipramine	Verapamil	0.9985
21972	Azithromycin	Phenytoin	0.9985
99261	Gemfibrozil	Minocycline	0.9985
97843	Galantamine	Tramadol	0.9985
95092	Formoterol	Omeprazole	0.9985
113886	Leflunomide	Minocycline	0.9985
97728	Galantamine	Pentoxifylline	0.9985
50874	Chlorothiazide	Minocycline	0.9985
48189	Celecoxib	Minocycline	0.9985
129894	Mycophenolic Acid	Saquinavir	0.9985
139051	Pentoxifylline	Rifabutin	0.9985
40459	Cefaclor	Phenytoin	0.9985
112302	Labetalol	Nortriptyline	0.9985
145315	Rifabutin	Zidovudine	0.9985
126941	Minocycline	Perindopril	0.9985
16681	Arsenic Trioxide	Fosphenytoin	0.9985
6313	Allopurinol	Nifedipine	0.9985
114757	Levetiracetam	Phenytoin	0.9985
96374	Fosphenytoin	Morphine	0.9985
135227	Omeprazole	Propafenone	0.9985
126929	Minocycline	Pamidronate	0.9985
127312	Mirtazapine	Mycophenolic Acid	0.9985
106511	Imatinib	Ziprasidone	0.9985
130018	Nabilone	Paclitaxel	0.9985
94982	Formoterol	Itraconazole	0.9985
117859	Losartan	Phenytoin	0.9985
103304	Hydrochlorothiazide	Minocycline	0.9985
110304	Itraconazole	Metformin	0.9985
124053	Methylphenidate	Ofloxacin	0.9984
78799	Enalapril	Morphine	0.9984
149014	Tizanidine	Zidovudine	0.9984
139924	Phenytoin	Saquinavir	0.9984
95969	Fosinopril	Itraconazole	0.9984
139902	Phenytoin	Quinapril	0.9984
95090	Formoterol	Olanzapine	0.9984
117910	Losartan	Ritonavir	0.9984
95231	Formoterol	Tramadol	0.9984
37976	Carbamazepine	Labetalol	0.9984
138879	Pentobarbital	Procaine	0.9984
96309	Fosphenytoin	Leflunomide	0.9984
30362	Bosentan	Mycophenolic Acid	0.9984
129436	Moxifloxacin	Phenytoin	0.9984
137597	Pantoprazole	Topiramate	0.9984
27386	Bicalutamide	Methylphenidate	0.9984
79612	Entacapone	Phenytoin	0.9984
94373	Fluvastatin	Methylphenidate	0.9984
6246	Allopurinol	Lovastatin	0.9984
124179	Methylphenidate	Tiagabine	0.9984
89912	Flecainide	Itraconazole	0.9984
95174	Formoterol	Rivastigmine	0.9984
21899	Azithromycin	Minocycline	0.9984
128001	Modafinil	Phenytoin	0.9984
140005	Phenytoin	Zidovudine	0.9984
78790	Enalapril	Mirtazapine	0.9984
113969	Leflunomide	Pramipexole	0.9984
59249	Clozapine	Rabeprazole	0.9984
48313	Celecoxib	Ritonavir	0.9984
95486	Foscarnet	Quetiapine	0.9984
94637	Fluvoxamine	Imatinib	0.9984
16775	Arsenic Trioxide	Methadone	0.9984
90442	Fluconazole	Rifabutin	0.9984
101503	Guanfacine	Ondansetron	0.9984
103115	Hydralazine	Reserpine	0.9984
149766	Valproic Acid	Voriconazole	0.9984
80673	Eprosartan	Nabilone	0.9984
95390	Foscarnet	Morphine	0.9984
123477	Methotrexate	Tacrolimus	0.9984
58226	Clonidine	Labetalol	0.9984
124164	Methylphenidate	Tamsulosin	0.9984
49469	Cetirizine	Itraconazole	0.9984
116336	Lisinopril	Pramipexole	0.9984
132685	Nifedipine	Olanzapine	0.9984
16466	Aripiprazole	Triamcinolone	0.9984
106533	Imipramine	Labetalol	0.9984
99894	Glimepiride	Minocycline	0.9984
95322	Foscarnet	Lamotrigine	0.9984
126308	Mifepristone	Pirbuterol	0.9984
54368	Cimetidine	Mefloquine	0.9984
87256	Famotidine	Phenytoin	0.9984
129793	Mycophenolic Acid	Nifedipine	0.9984
139055	Pentoxifylline	Risedronate	0.9984
125533	Metronidazole	Topiramate	0.9984
33231	Bumetanide	Mefloquine	0.9984
61385	Cysteamine	Secobarbital	0.9984
122437	Metformin	Nitroglycerin	0.9984
38094	Carbamazepine	Paricalcitol	0.9984
38048	Carbamazepine	Moxifloxacin	0.9984
120221	Mefloquine	Verapamil	0.9984
114097	Leflunomide	Zidovudine	0.9984
147861	Tamoxifen	Zolpidem	0.9984
123341	Methotrexate	Moxifloxacin	0.9984
48076	Celecoxib	Fosphenytoin	0.9984
113984	Leflunomide	Propafenone	0.9984
39851	Carvedilol	Itraconazole	0.9984
129291	Morphine	Saquinavir	0.9984
110058	Isradipine	Nabilone	0.9984
78055	Efavirenz	Naproxen	0.9984
127366	Mirtazapine	Perindopril	0.9984
25857	Betaxolol	Leflunomide	0.9984
95078	Formoterol	Nifedipine	0.9984
34685	Buspirone	Methadone	0.9984
119847	Mefenamic Acid	Phenytoin	0.9984
14137	Anagrelide	Itraconazole	0.9984
134686	Ofloxacin	Phenytoin	0.9984
59083	Clozapine	Lansoprazole	0.9984
100209	Glipizide	Minocycline	0.9984
99834	Glimepiride	Labetalol	0.9984
88060	Fenofibrate	Tizanidine	0.9984
148405	Testosterone	Tizanidine	0.9984
127407	Mirtazapine	Quinine	0.9984
139062	Pentoxifylline	Salmeterol	0.9984
22023	Azithromycin	Ritonavir	0.9984
148708	Tiagabine	Tizanidine	0.9984
11130	Amitriptyline	Pentoxifylline	0.9984
30091	Bosentan	Carnitine	0.9984
113177	Lamotrigine	Propafenone	0.9984
127354	Mirtazapine	Pamidronate	0.9984
87665	Felodipine	Salmeterol	0.9984
36821	Capecitabine	Voriconazole	0.9984
131777	Nelfinavir	Perindopril	0.9984
55587	Citalopram	Foscarnet	0.9984
127040	Minocycline	Ticlopidine	0.9984
28859	Bisoprolol	Methadone	0.9984
71916	Disopyramide	Pentoxifylline	0.9984
105046	Ibuprofen	Itraconazole	0.9984
122539	Metformin	Sotalol	0.9984
97607	Galantamine	Leflunomide	0.9984
11768	Amlodipine	Topiramate	0.9984
141259	Pramipexole	Rabeprazole	0.9984
59239	Clozapine	Propofol	0.9984
10520	Amiodarone	Methotrexate	0.9984
36355	Capecitabine	Carbamazepine	0.9984
10743	Amiodarone	Voriconazole	0.9984
70873	Diltiazem	Ziprasidone	0.9984
30134	Bosentan	Clonidine	0.9984
121698	Meropenem	Minocycline	0.9984
88067	Fenofibrate	Topiramate	0.9983
94664	Fluvoxamine	Leflunomide	0.9983
135253	Omeprazole	Ritonavir	0.9983
116294	Lisinopril	Olanzapine	0.9983
6382	Allopurinol	Propafenone	0.9983
97014	Furosemide	Minocycline	0.9983
63962	Delavirdine	Verapamil	0.9983
6298	Allopurinol	Mycophenolic Acid	0.9983
129576	Moxifloxacin	Zolpidem	0.9983
124212	Methylphenidate	Valproic Acid	0.9983
16290	Aripiprazole	Moxifloxacin	0.9983
121354	Mepivacaine	Secobarbital	0.9983
123438	Methotrexate	Quinine	0.9983
114068	Leflunomide	Tramadol	0.9983
144123	Quetiapine	Saquinavir	0.9983
11003	Amitriptyline	Labetalol	0.9983
136207	Oxaprozin	Phenytoin	0.9983
75056	Doxazosin	Pramipexole	0.9983
123536	Methotrexate	Voriconazole	0.9983
34802	Buspirone	Propafenone	0.9983
49423	Cetirizine	Fosphenytoin	0.9983
123331	Methotrexate	Mirtazapine	0.9983
124148	Methylphenidate	Simvastatin	0.9983
95147	Formoterol	Propafenone	0.9983
14903	Anastrozole	Topiramate	0.9983
10277	Amiodarone	Carbamazepine	0.9983
30234	Bosentan	Fosinopril	0.9983
40050	Carvedilol	Selegiline	0.9983
94710	Fluvoxamine	Metoprolol	0.9983
10469	Amiodarone	Itraconazole	0.9983
12003	Amoxapine	Furosemide	0.9983
113953	Leflunomide	Pentoxifylline	0.9983
58966	Clozapine	Doxazosin	0.9983
36744	Capecitabine	Saquinavir	0.9983
126909	Minocycline	Nizatidine	0.9983
97284	Gabapentin	Leflunomide	0.9983
95505	Foscarnet	Ropinirole	0.9983
36793	Capecitabine	Topiramate	0.9983
113227	Lamotrigine	Tacrolimus	0.9983
38092	Carbamazepine	Pamidronate	0.9983
81738	Erythromycin	Mefloquine	0.9983
139941	Phenytoin	Sumatriptan	0.9983
118281	Loxapine	Metoprolol	0.9983
137700	Paricalcitol	Ropinirole	0.9983
113561	Lansoprazole	Ziprasidone	0.9983
126396	Mifepristone	Tiludronate	0.9983
80840	Eprosartan	Tramadol	0.9983
17001	Arsenic Trioxide	Voriconazole	0.9983
70794	Diltiazem	Sertraline	0.9983
7618	Amifostine	Bupivacaine	0.9983
34354	Bupropion	Saquinavir	0.9983
97967	Ganciclovir	Methotrexate	0.9983
79000	Enalapril	Ziprasidone	0.9983
58955	Clozapine	Diltiazem	0.9983
96430	Fosphenytoin	Pentoxifylline	0.9983
122823	Methadone	Treprostinil	0.9983
94936	Formoterol	Fosphenytoin	0.9983
139123	Pentoxifylline	Trifluoperazine	0.9983
7731	Amifostine	Erythromycin	0.9983
59151	Clozapine	Moxifloxacin	0.9983
39149	Carnitine	Tiotropium	0.9983
78938	Enalapril	Tamoxifen	0.9983
87955	Fenofibrate	Pentoxifylline	0.9983
103207	Hydralazine	Warfarin	0.9983
116481	Lithium	Mefloquine	0.9983
70330	Dihydroergotamine	Pentoxifylline	0.9983
30348	Bosentan	Minocycline	0.9983
24914	Benazepril	Minocycline	0.9983
110427	Itraconazole	Protriptyline	0.9983
107832	Indomethacin	Phenytoin	0.9983
16610	Arsenic Trioxide	Diltiazem	0.9983
68898	Didanosine	Efavirenz	0.9983
38966	Carnitine	Methylphenidate	0.9983
122728	Methadone	Procainamide	0.9983
95197	Formoterol	Tacrolimus	0.9983
110365	Itraconazole	Olanzapine	0.9983
54335	Cimetidine	Ketoconazole	0.9983
110330	Itraconazole	Moexipril	0.9983
127029	Minocycline	Terazosin	0.9983
25844	Betaxolol	Itraconazole	0.9983
127024	Minocycline	Tamsulosin	0.9983
70545	Diltiazem	Foscarnet	0.9983
132789	Nifedipine	Sulfisoxazole	0.9983
112274	Labetalol	Morphine	0.9983
118769	Maprotiline	Methadone	0.9983
67340	Diazoxide	Galantamine	0.9983
139177	Perindopril	Propafenone	0.9983
15258	Apraclonidine	Nabilone	0.9983
148597	Thiabendazole	Warfarin	0.9983
114085	Leflunomide	Valproic Acid	0.9983
18403	Atomoxetine	Pentoxifylline	0.9983
106299	Imatinib	Minocycline	0.9983
143708	Protriptyline	Tadalafil	0.9983
131315	Naltrexone	Topiramate	0.9983
146556	Selegiline	Zolpidem	0.9983
36738	Capecitabine	Ritonavir	0.9983
88011	Fenofibrate	Risperidone	0.9983
146572	Sertraline	Tacrolimus	0.9983
87747	Felodipine	Zidovudine	0.9983
127891	Mitoxantrone	Tizanidine	0.9983
34111	Bupropion	Fosphenytoin	0.9983
54307	Cimetidine	Hydrochlorothiazide	0.9983
123370	Methotrexate	Olanzapine	0.9983
95282	Foscarnet	Guanfacine	0.9983
14191	Anagrelide	Methylphenidate	0.9983
95528	Foscarnet	Tadalafil	0.9983
124227	Methylphenidate	Zonisamide	0.9983
37302	Captopril	Zolpidem	0.9983
101399	Guanfacine	Labetalol	0.9983
6357	Allopurinol	Phenytoin	0.9983
125157	Metoprolol	Nelfinavir	0.9983
148846	Timolol	Tizanidine	0.9983
90368	Fluconazole	Ondansetron	0.9983
144521	Rabeprazole	Zolpidem	0.9983
106431	Imatinib	Selegiline	0.9983
146499	Selegiline	Terazosin	0.9983
120119	Mefloquine	Propranolol	0.9983
90840	Fludarabine	Tizanidine	0.9983
134829	Olanzapine	Omeprazole	0.9983
16535	Arsenic Trioxide	Carbamazepine	0.9983
120231	Mefloquine	Zolpidem	0.9982
110339	Itraconazole	Nabilone	0.9982
1837	Acetazolamide	Fluconazole	0.9982
16919	Arsenic Trioxide	Rivastigmine	0.9982
137630	Pantoprazole	Ziprasidone	0.9982
75817	Doxorubicin	Phenytoin	0.9982
63649	Delavirdine	Gabapentin	0.9982
122716	Methadone	Pirbuterol	0.9982
110329	Itraconazole	Modafinil	0.9982
116264	Lisinopril	Morphine	0.9982
35175	Cabergoline	Metoprolol	0.9982
90270	Fluconazole	Leflunomide	0.9982
96510	Fosphenytoin	Sumatriptan	0.9982
23392	Baclofen	Methadone	0.9982
130291	Nabumetone	Saquinavir	0.9982
112279	Labetalol	Nabumetone	0.9982
87250	Famotidine	Pentoxifylline	0.9982
110523	Itraconazole	Valproic Acid	0.9982
125169	Metoprolol	Nizatidine	0.9982
59931	Cyclobenzaprine	Lamotrigine	0.9982
38196	Carbamazepine	Testosterone	0.9982
137541	Pantoprazole	Risperidone	0.9982
113528	Lansoprazole	Topiramate	0.9982
130019	Nabilone	Pamidronate	0.9982
34396	Bupropion	Tizanidine	0.9982
103030	Hydralazine	Nimodipine	0.9982
105285	Ibuprofen	Tizanidine	0.9982
21883	Azithromycin	Methotrexate	0.9982
130374	Nabumetone	Zolpidem	0.9982
97985	Ganciclovir	Mirtazapine	0.9982
37297	Captopril	Warfarin	0.9982
48122	Celecoxib	Itraconazole	0.9982
112333	Labetalol	Phenelzine	0.9982
94319	Fluvastatin	Itraconazole	0.9982
148887	Timolol	Zolpidem	0.9982
136313	Oxaprozin	Topiramate	0.9982
16495	Arsenic Trioxide	Atomoxetine	0.9982
95179	Formoterol	Saquinavir	0.9982
132774	Nifedipine	Saquinavir	0.9982
113498	Lansoprazole	Tadalafil	0.9982
139003	Pentoxifylline	Phenelzine	0.9982
39837	Carvedilol	Imatinib	0.9982
78670	Enalapril	Fluvoxamine	0.9982
110469	Itraconazole	Sulfisoxazole	0.9982
95051	Formoterol	Mirtazapine	0.9982
139083	Pentoxifylline	Tamoxifen	0.9982
131817	Nelfinavir	Quinapril	0.9982
149860	Warfarin	Zidovudine	0.9982
122745	Methadone	Quinine	0.9982
132727	Nifedipine	Pramipexole	0.9982
81060	Ergotamine	Nimodipine	0.9982
23344	Baclofen	Itraconazole	0.9982
143193	Propafenone	Valproic Acid	0.9982
120142	Mefloquine	Ritonavir	0.9982
97791	Galantamine	Saquinavir	0.9982
97810	Galantamine	Tadalafil	0.9982
78920	Enalapril	Selegiline	0.9982
87434	Felodipine	Glimepiride	0.9982
139203	Perindopril	Ritonavir	0.9982
100504	Glycopyrrolate	Methadone	0.9982
99194	Gemfibrozil	Itraconazole	0.9982
139006	Pentoxifylline	Phenytoin	0.9982
137485	Pantoprazole	Pentoxifylline	0.9982
13929	Anagrelide	Bosentan	0.9982
112244	Labetalol	Methadone	0.9982
94776	Fluvoxamine	Paricalcitol	0.9982
1603	Acebutolol	Topiramate	0.9982
93115	Fluphenazine	Pentoxifylline	0.9982
87579	Felodipine	Omeprazole	0.9982
79662	Entacapone	Risperidone	0.9982
143704	Protriptyline	Sulfisoxazole	0.9982
139120	Pentoxifylline	Treprostinil	0.9982
126885	Minocycline	Moxifloxacin	0.9982
11314	Amlodipine	Bosentan	0.9982
111991	Ketorolac	Mirtazapine	0.9982
114009	Leflunomide	Risperidone	0.9982
30231	Bosentan	Formoterol	0.9982
129971	Mycophenolic Acid	Voriconazole	0.9982
23478	Baclofen	Pentoxifylline	0.9982
30833	Bretylium	Mifepristone	0.9982
97604	Galantamine	Lamotrigine	0.9982
143117	Propafenone	Risperidone	0.9982
145966	Ropinirole	Saquinavir	0.9982
127396	Mirtazapine	Propafenone	0.9982
11662	Amlodipine	Phenytoin	0.9982
127509	Mirtazapine	Zidovudine	0.9982
117911	Losartan	Rivastigmine	0.9982
137786	Paricalcitol	Ziprasidone	0.9982
145610	Risedronate	Selegiline	0.9982
96301	Fosphenytoin	Ketoprofen	0.9982
122805	Methadone	Timolol	0.9982
6351	Allopurinol	Pentoxifylline	0.9982
135311	Omeprazole	Tramadol	0.9982
145806	Ritonavir	Sumatriptan	0.9982
34167	Bupropion	Lamotrigine	0.9982
128151	Moexipril	Nabilone	0.9982
110538	Itraconazole	Zonisamide	0.9982
19030	Atorvastatin	Tramadol	0.9982
127423	Mirtazapine	Rivastigmine	0.9982
24639	Benazepril	Bosentan	0.9982
21640	Azithromycin	Carbamazepine	0.9982
96937	Furosemide	Indinavir	0.9982
125265	Metoprolol	Selegiline	0.9982
99511	Gemifloxacin	Itraconazole	0.9982
26118	Betaxolol	Voriconazole	0.9982
29050	Bisoprolol	Tizanidine	0.9982
144162	Quetiapine	Timolol	0.9982
92657	Fluoxetine	Leflunomide	0.9982
70250	Dihydroergotamine	Methylphenidate	0.9982
94609	Fluvoxamine	Galantamine	0.9982
121713	Meropenem	Nabilone	0.9982
78131	Efavirenz	Propafenone	0.9982
149552	Triamcinolone	Zolpidem	0.9982
7979	Amifostine	Procaine	0.9982
90652	Fludarabine	Methotrexate	0.9982
30359	Bosentan	Morphine	0.9982
16892	Arsenic Trioxide	Propafenone	0.9982
10052	Aminophylline	Ondansetron	0.9982
84571	Ethotoin	Fosphenytoin	0.9981
40001	Carvedilol	Pramipexole	0.9981
1424	Acebutolol	Minocycline	0.9981
131912	Nelfinavir	Verapamil	0.9981
120002	Mefloquine	Methotrexate	0.9981
78003	Efavirenz	Mefloquine	0.9981
132317	Nicardipine	Ondansetron	0.9981
106425	Imatinib	Ropinirole	0.9981
107692	Indomethacin	Itraconazole	0.9981
103014	Hydralazine	Nabilone	0.9981
30474	Bosentan	Ropinirole	0.9981
70476	Dihydroergotamine	Zolpidem	0.9981
71864	Disopyramide	Nabilone	0.9981
55695	Citalopram	Metoprolol	0.9981
6171	Allopurinol	Fosphenytoin	0.9981
148412	Testosterone	Topiramate	0.9981
97790	Galantamine	Salmeterol	0.9981
99799	Glimepiride	Haloperidol	0.9981
55269	Ciprofloxacin	Minocycline	0.9981
60055	Cyclobenzaprine	Pentoxifylline	0.9981
36496	Capecitabine	Fluvoxamine	0.9981
11761	Amlodipine	Tizanidine	0.9981
11476	Amlodipine	Fosphenytoin	0.9981
110451	Itraconazole	Ropivacaine	0.9981
94897	Fluvoxamine	Topiramate	0.9981
131896	Nelfinavir	Treprostinil	0.9981
78649	Enalapril	Felodipine	0.9981
139261	Perindopril	Tramadol	0.9981
37855	Carbamazepine	Disopyramide	0.9981
49666	Cetirizine	Saquinavir	0.9981
35044	Cabergoline	Felodipine	0.9981
139939	Phenytoin	Sulfisoxazole	0.9981
16821	Arsenic Trioxide	Nicardipine	0.9981
131259	Naltrexone	Risperidone	0.9981
97550	Gabapentin	Ziprasidone	0.9981
23298	Baclofen	Fosphenytoin	0.9981
137551	Pantoprazole	Sertraline	0.9981
106422	Imatinib	Risperidone	0.9981
105186	Ibuprofen	Phenytoin	0.9981
94917	Fluvoxamine	Valproic Acid	0.9981
87639	Felodipine	Protriptyline	0.9981
75180	Doxazosin	Voriconazole	0.9981
23583	Baclofen	Tizanidine	0.9981
127792	Mitoxantrone	Phenytoin	0.9981
130064	Nabilone	Propranolol	0.9981
127310	Mirtazapine	Moxifloxacin	0.9981
90357	Fluconazole	Nitrofurantoin	0.9981
107759	Indomethacin	Minocycline	0.9981
100590	Glycopyrrolate	Pentoxifylline	0.9981
113261	Lamotrigine	Tramadol	0.9981
37091	Captopril	Mirtazapine	0.9981
107981	Irbesartan	Itraconazole	0.9981
139906	Phenytoin	Ramipril	0.9981
146550	Selegiline	Voriconazole	0.9981
75103	Doxazosin	Saquinavir	0.9981
122390	Metformin	Methylphenidate	0.9981
63773	Delavirdine	Mycophenolic Acid	0.9981
95261	Formoterol	Ziprasidone	0.9981
16901	Arsenic Trioxide	Quetiapine	0.9981
100114	Glipizide	Haloperidol	0.9981
120057	Mefloquine	Nortriptyline	0.9981
122166	Metaproterenol	Mifepristone	0.9981
59253	Clozapine	Remifentanil	0.9981
34238	Bupropion	Mycophenolic Acid	0.9981
137310	Paclitaxel	Voriconazole	0.9981
120495	Meloxicam	Metoprolol	0.9981
100102	Glimepiride	Warfarin	0.9981
122672	Methadone	Nizatidine	0.9981
133088	Nimodipine	Pindolol	0.9981
127023	Minocycline	Tamoxifen	0.9981
24847	Benazepril	Itraconazole	0.9981
78886	Enalapril	Propafenone	0.9981
130093	Nabilone	Saquinavir	0.9981
123453	Methotrexate	Ritonavir	0.9981
63826	Delavirdine	Pentoxifylline	0.9981
37022	Captopril	Itraconazole	0.9981
114046	Leflunomide	Testosterone	0.9981
137516	Pantoprazole	Propafenone	0.9981
95371	Foscarnet	Metoprolol	0.9981
96419	Fosphenytoin	Pamidronate	0.9981
148181	Terazosin	Tiotropium	0.9981
131308	Naltrexone	Tizanidine	0.9981
6227	Allopurinol	Lamotrigine	0.9981
112307	Labetalol	Ondansetron	0.9981
38840	Carnitine	Felodipine	0.9981
49523	Cetirizine	Methylphenidate	0.9981
139113	Pentoxifylline	Topotecan	0.9981
134443	Norfloxacin	Topiramate	0.9981
114058	Leflunomide	Tizanidine	0.9981
18832	Atorvastatin	Methotrexate	0.9981
132338	Nicardipine	Pentazocine	0.9981
110315	Itraconazole	Metolazone	0.9981
112263	Labetalol	Minocycline	0.9981
34771	Buspirone	Pentoxifylline	0.9981
93514	Flurbiprofen	Saquinavir	0.9981
27124	Bicalutamide	Bosentan	0.9981
149854	Voriconazole	Zidovudine	0.9981
39774	Carvedilol	Etoposide	0.9981
124022	Methylphenidate	Montelukast	0.9981
16918	Arsenic Trioxide	Ritonavir	0.9981
95379	Foscarnet	Minocycline	0.9981
87129	Famotidine	Leflunomide	0.9981
127003	Minocycline	Saquinavir	0.9981
149017	Tizanidine	Zonisamide	0.9981
18863	Atorvastatin	Nabilone	0.9981
59079	Clozapine	Labetalol	0.9981
54529	Cimetidine	Secobarbital	0.9981
30363	Bosentan	Nabilone	0.9981
30352	Bosentan	Mitoxantrone	0.9981
129228	Morphine	Pentoxifylline	0.9981
137699	Paricalcitol	Rivastigmine	0.9981
139292	Perindopril	Zolpidem	0.9981
132794	Nifedipine	Tamoxifen	0.9981
6224	Allopurinol	Labetalol	0.9981
36557	Capecitabine	Lamotrigine	0.9981
11802	Amlodipine	Zolpidem	0.9981
131828	Nelfinavir	Rifapentine	0.9981
149822	Verapamil	Zolpidem	0.9981
18840	Atorvastatin	Metoprolol	0.9981
95591	Foscarnet	Ziprasidone	0.9981
6166	Allopurinol	Fluvoxamine	0.9981
113146	Lamotrigine	Pentoxifylline	0.9981
96431	Fosphenytoin	Perindopril	0.9981
38052	Carbamazepine	Nabumetone	0.9981
19020	Atorvastatin	Tizanidine	0.9981
59263	Clozapine	Ritonavir	0.9981
139286	Perindopril	Voriconazole	0.9981
126877	Minocycline	Mitoxantrone	0.9981
39805	Carvedilol	Fosphenytoin	0.9981
149821	Verapamil	Ziprasidone	0.9981
114008	Leflunomide	Risedronate	0.9981
125174	Metoprolol	Olanzapine	0.9981
78044	Efavirenz	Morphine	0.9981
95156	Formoterol	Quetiapine	0.9981
30431	Bosentan	Pramipexole	0.9981
71710	Disopyramide	Felodipine	0.9981
149367	Tramadol	Valproic Acid	0.9981
106526	Imipramine	Itraconazole	0.9981
130174	Nabilone	Zidovudine	0.9981
138841	Pentazocine	Verapamil	0.9981
108050	Irbesartan	Mirtazapine	0.998
105115	Ibuprofen	Mirtazapine	0.998
24987	Benazepril	Phenytoin	0.998
78074	Efavirenz	Olanzapine	0.998
148886	Timolol	Ziprasidone	0.998
114856	Levetiracetam	Tizanidine	0.998
127080	Minocycline	Voriconazole	0.998
138846	Pentazocine	Warfarin	0.998
97631	Galantamine	Mefloquine	0.998
97690	Galantamine	Nifedipine	0.998
38047	Carbamazepine	Morphine	0.998
63891	Delavirdine	Selegiline	0.998
11576	Amlodipine	Methylphenidate	0.998
149771	Valproic Acid	Ziprasidone	0.998
134584	Nortriptyline	Sulfisoxazole	0.998
25652	Betaxolol	Carbamazepine	0.998
30421	Bosentan	Phenytoin	0.998
18363	Atomoxetine	Nicardipine	0.998
95420	Foscarnet	Olanzapine	0.998
19084	Atovaquone	Bosentan	0.998
18269	Atomoxetine	Itraconazole	0.998
59132	Clozapine	Metronidazole	0.998
115454	Lidocaine	Methadone	0.998
30388	Bosentan	Ofloxacin	0.998
38146	Carbamazepine	Rabeprazole	0.998
94601	Fluvoxamine	Formoterol	0.998
87482	Felodipine	Leflunomide	0.998
59130	Clozapine	Metolazone	0.998
97322	Gabapentin	Methotrexate	0.998
96471	Fosphenytoin	Quinapril	0.998
110510	Itraconazole	Trazodone	0.998
126078	Midodrine	Pentoxifylline	0.998
96340	Fosphenytoin	Meropenem	0.998
6276	Allopurinol	Metoprolol	0.998
127073	Minocycline	Valsartan	0.998
10420	Amiodarone	Foscarnet	0.998
30518	Bosentan	Tiotropium	0.998
6834	Amantadine	Nabilone	0.998
143762	Protriptyline	Verapamil	0.998
50651	Chlorothiazide	Cimetidine	0.998
11570	Amlodipine	Methadone	0.998
88101	Fenofibrate	Zolpidem	0.998
49708	Cetirizine	Tizanidine	0.998
106762	Imipramine	Timolol	0.998
121267	Mepivacaine	Ondansetron	0.998
132680	Nifedipine	Nizatidine	0.998
37162	Captopril	Phenytoin	0.998
133198	Nimodipine	Treprostinil	0.998
97083	Furosemide	Perphenazine	0.998
99565	Gemifloxacin	Methylphenidate	0.998
106424	Imatinib	Rivastigmine	0.998
144726	Ramipril	Zolpidem	0.998
87396	Famotidine	Zolpidem	0.998
16943	Arsenic Trioxide	Tadalafil	0.998
117767	Losartan	Methadone	0.998
113888	Leflunomide	Mirtazapine	0.998
111462	Ketoconazole	Nelfinavir	0.998
39812	Carvedilol	Gefitinib	0.998
122001	Mesoridazine	Pentoxifylline	0.998
144434	Rabeprazole	Ropinirole	0.998
59308	Clozapine	Timolol	0.998
15230	Apraclonidine	Methylphenidate	0.998
135469	Ondansetron	Tiotropium	0.998
106873	Imiquimod	Methylphenidate	0.998
124046	Methylphenidate	Nitrofurantoin	0.998
29091	Bisoprolol	Zolpidem	0.998
78711	Enalapril	Indinavir	0.998
18767	Atorvastatin	Imatinib	0.998
95073	Formoterol	Nelfinavir	0.998
106738	Imipramine	Sulfisoxazole	0.998
125319	Metoprolol	Trazodone	0.998
22081	Azithromycin	Tramadol	0.998
132753	Nifedipine	Quinine	0.998
118174	Lovastatin	Sotalol	0.998
112243	Labetalol	Metformin	0.998
12047	Amoxapine	Itraconazole	0.998
54376	Cimetidine	Mesoridazine	0.998
78134	Efavirenz	Propranolol	0.998
22106	Azithromycin	Voriconazole	0.998
102996	Hydralazine	Mifepristone	0.998
120675	Meloxicam	Tizanidine	0.998
59224	Clozapine	Prazosin	0.998
122377	Metaproterenol	Warfarin	0.998
110348	Itraconazole	Nelfinavir	0.998
148446	Testosterone	Zolpidem	0.998
93271	Flurbiprofen	Fosphenytoin	0.998
103237	Hydrochlorothiazide	Itraconazole	0.998
127012	Minocycline	Stavudine	0.998
145828	Ritonavir	Timolol	0.998
18317	Atomoxetine	Methadone	0.998
110619	Ivermectin	Nabilone	0.998
137723	Paricalcitol	Tadalafil	0.998
30369	Bosentan	Naltrexone	0.998
130072	Nabilone	Quinine	0.998
131765	Nelfinavir	Pamidronate	0.998
39128	Carnitine	Tadalafil	0.998
124028	Methylphenidate	Nabilone	0.998
139890	Phenytoin	Progesterone	0.998
116386	Lisinopril	Sertraline	0.998
18628	Atorvastatin	Citalopram	0.998
25746	Betaxolol	Efavirenz	0.998
16017	Aripiprazole	Captopril	0.998
55202	Ciprofloxacin	Itraconazole	0.998
10996	Amitriptyline	Itraconazole	0.998
14374	Anagrelide	Tiotropium	0.998
114056	Leflunomide	Tiotropium	0.998
30416	Bosentan	Perindopril	0.998
126922	Minocycline	Oxaprozin	0.998
18709	Atorvastatin	Felodipine	0.998
146095	Ropivacaine	Tizanidine	0.998
1497	Acebutolol	Phenytoin	0.998
141587	Prazosin	Topiramate	0.998
110293	Itraconazole	Mefenamic Acid	0.998
145955	Rivastigmine	Voriconazole	0.998
137547	Pantoprazole	Salmeterol	0.998
6168	Allopurinol	Foscarnet	0.998
80782	Eprosartan	Ritonavir	0.998
124051	Methylphenidate	Norfloxacin	0.998
102048	Haloperidol	Mefloquine	0.998
119776	Mefenamic Acid	Mirtazapine	0.998
87672	Felodipine	Sotalol	0.998
96490	Fosphenytoin	Ropivacaine	0.998
110490	Itraconazole	Tiagabine	0.998
139960	Phenytoin	Tiagabine	0.998
103512	Hydrochlorothiazide	Warfarin	0.998
112253	Labetalol	Metoclopramide	0.998
132851	Nifedipine	Voriconazole	0.998
132843	Nifedipine	Valproic Acid	0.998
30354	Bosentan	Moexipril	0.998
125369	Metronidazole	Nabilone	0.998
125346	Metoprolol	Zolpidem	0.998
38960	Carnitine	Methadone	0.998
99248	Gemfibrozil	Methylphenidate	0.998
147924	Tamsulosin	Zolpidem	0.998
71830	Disopyramide	Methadone	0.998
59144	Clozapine	Modafinil	0.998
143126	Propafenone	Selegiline	0.998
29577	Bleomycin	Warfarin	0.9979
148842	Tiludronate	Zolpidem	0.9979
125526	Metronidazole	Tizanidine	0.9979
125305	Metoprolol	Tizanidine	0.9979
113946	Leflunomide	Paroxetine	0.9979
139047	Pentoxifylline	Remifentanil	0.9979
126940	Minocycline	Pentoxifylline	0.9979
124068	Methylphenidate	Paclitaxel	0.9979
129486	Moxifloxacin	Risperidone	0.9979
113475	Lansoprazole	Ropinirole	0.9979
30449	Bosentan	Propranolol	0.9979
127458	Mirtazapine	Testosterone	0.9979
10565	Amiodarone	Nifedipine	0.9979
124035	Methylphenidate	Naproxen	0.9979
106537	Imipramine	Lansoprazole	0.9979
101766	Halofantrine	Mifepristone	0.9979
122000	Mesoridazine	Pentobarbital	0.9979
70265	Dihydroergotamine	Mirtazapine	0.9979
48256	Celecoxib	Pentoxifylline	0.9979
146043	Ropinirole	Voriconazole	0.9979
30154	Bosentan	Dexmedetomidine	0.9979
97675	Galantamine	Mycophenolic Acid	0.9979
85870	Etoposide	Quinine	0.9979
96287	Fosphenytoin	Indomethacin	0.9979
123540	Methotrexate	Zidovudine	0.9979
143205	Propafenone	Zidovudine	0.9979
87715	Felodipine	Topiramate	0.9979
38136	Carbamazepine	Propofol	0.9979
137657	Paricalcitol	Pramipexole	0.9979
16796	Arsenic Trioxide	Mirtazapine	0.9979
59928	Cyclobenzaprine	Labetalol	0.9979
30213	Bosentan	Fexofenadine	0.9979
99757	Gemifloxacin	Topiramate	0.9979
23354	Baclofen	Lamotrigine	0.9979
70645	Diltiazem	Methotrexate	0.9979
39052	Carnitine	Phenytoin	0.9979
6800	Amantadine	Methadone	0.9979
30194	Bosentan	Esmolol	0.9979
10392	Amiodarone	Etoposide	0.9979
75957	Doxorubicin	Zolpidem	0.9979
126995	Minocycline	Risedronate	0.9979
38120	Carbamazepine	Pravastatin	0.9979
135332	Omeprazole	Verapamil	0.9979
112372	Labetalol	Quinine	0.9979
99909	Glimepiride	Nabilone	0.9979
59327	Clozapine	Triamcinolone	0.9979
147061	Stavudine	Tizanidine	0.9979
6029	Allopurinol	Carvedilol	0.9979
108323	Irinotecan	Methylphenidate	0.9979
75426	Doxepin	Pentoxifylline	0.9979
38029	Carbamazepine	Metronidazole	0.9979
30548	Bosentan	Valsartan	0.9979
67419	Diazoxide	Mefloquine	0.9979
139967	Phenytoin	Tobramycin	0.9979
117968	Losartan	Tramadol	0.9979
6491	Allopurinol	Voriconazole	0.9979
8035	Amifostine	Tadalafil	0.9979
96255	Fosphenytoin	Ganciclovir	0.9979
15392	Apraclonidine	Tadalafil	0.9979
122434	Metformin	Nimodipine	0.9979
113239	Lamotrigine	Testosterone	0.9979
48108	Celecoxib	Imatinib	0.9979
127356	Mirtazapine	Paricalcitol	0.9979
70868	Diltiazem	Voriconazole	0.9979
100282	Glipizide	Phenytoin	0.9979
130284	Nabumetone	Risperidone	0.9979
97787	Galantamine	Ropinirole	0.9979
148931	Tiotropium	Zolpidem	0.9979
119353	Mecamylamine	Phenelzine	0.9979
95422	Foscarnet	Omeprazole	0.9979
99925	Glimepiride	Nimodipine	0.9979
120029	Mefloquine	Morphine	0.9979
132846	Nifedipine	Venlafaxine	0.9979
114019	Leflunomide	Sertraline	0.9979
139057	Pentoxifylline	Ritonavir	0.9979
36317	Candesartan	Topiramate	0.9979
100190	Glipizide	Methadone	0.9979
96403	Fosphenytoin	Ofloxacin	0.9979
145908	Rivastigmine	Testosterone	0.9979
133724	Nitroglycerin	Tiotropium	0.9979
55085	Ciprofloxacin	Diltiazem	0.9979
24916	Benazepril	Mirtazapine	0.9979
21786	Azithromycin	Fosphenytoin	0.9979
120626	Meloxicam	Risperidone	0.9979
10788	Amitriptyline	Bosentan	0.9979
125135	Metoprolol	Mirtazapine	0.9979
38137	Carbamazepine	Propranolol	0.9979
87167	Famotidine	Methotrexate	0.9979
21842	Azithromycin	Lamotrigine	0.9979
35284	Cabergoline	Propranolol	0.9979
95093	Formoterol	Ondansetron	0.9979
39802	Carvedilol	Foscarnet	0.9979
6162	Allopurinol	Flurbiprofen	0.9979
122552	Metformin	Tadalafil	0.9979
34644	Buspirone	Labetalol	0.9979
19035	Atorvastatin	Treprostinil	0.9979
10324	Amiodarone	Clozapine	0.9979
1394	Acebutolol	Mefloquine	0.9979
145927	Rivastigmine	Topiramate	0.9979
55586	Citalopram	Formoterol	0.9979
23534	Baclofen	Risperidone	0.9979
105059	Ibuprofen	Leflunomide	0.9979
63800	Delavirdine	Olanzapine	0.9979
146392	Saquinavir	Zonisamide	0.9979
16964	Arsenic Trioxide	Tiotropium	0.9979
48359	Celecoxib	Tiotropium	0.9979
90491	Fluconazole	Ticlopidine	0.9979
34715	Buspirone	Morphine	0.9979
14287	Anagrelide	Pramipexole	0.9979
146806	Sotalol	Sulfisoxazole	0.9979
87560	Felodipine	Nelfinavir	0.9979
18504	Atomoxetine	Tiludronate	0.9979
30495	Bosentan	Sumatriptan	0.9979
124755	Metoclopramide	Pentoxifylline	0.9979
145878	Rivastigmine	Saquinavir	0.9979
30269	Bosentan	Imiquimod	0.9979
110346	Itraconazole	Naproxen	0.9979
132831	Nifedipine	Treprostinil	0.9979
116234	Lisinopril	Methadone	0.9979
112062	Ketorolac	Phenytoin	0.9979
37116	Captopril	Nicardipine	0.9979
17006	Arsenic Trioxide	Ziprasidone	0.9979
130368	Nabumetone	Voriconazole	0.9979
30508	Bosentan	Testosterone	0.9979
107056	Imiquimod	Tiotropium	0.9979
118305	Loxapine	Nabumetone	0.9979
16823	Arsenic Trioxide	Nifedipine	0.9979
93556	Flurbiprofen	Tizanidine	0.9979
139333	Perphenazine	Quinine	0.9979
70716	Diltiazem	Paclitaxel	0.9979
48296	Celecoxib	Quetiapine	0.9979
59031	Clozapine	Ganciclovir	0.9979
137316	Paclitaxel	Zolpidem	0.9979
94565	Fluvastatin	Topiramate	0.9979
14724	Anastrozole	Minocycline	0.9979
23199	Baclofen	Clozapine	0.9979
118008	Lovastatin	Mefloquine	0.9979
141532	Prazosin	Ritonavir	0.9979
38209	Carbamazepine	Tobramycin	0.9979
16489	Aripiprazole	Zidovudine	0.9978
134854	Olanzapine	Perindopril	0.9978
120045	Mefloquine	Nicardipine	0.9978
87971	Fenofibrate	Pramipexole	0.9978
90324	Fluconazole	Minocycline	0.9978
120064	Mefloquine	Orphenadrine	0.9978
145677	Risedronate	Valproic Acid	0.9978
110391	Itraconazole	Pentoxifylline	0.9978
78921	Enalapril	Sertraline	0.9978
132804	Nifedipine	Testosterone	0.9978
10645	Amiodarone	Quinine	0.9978
137756	Paricalcitol	Tramadol	0.9978
95497	Foscarnet	Rifabutin	0.9978
113360	Lansoprazole	Morphine	0.9978
127053	Minocycline	Topotecan	0.9978
123436	Methotrexate	Quetiapine	0.9978
145719	Risperidone	Tamoxifen	0.9978
74957	Doxazosin	Methotrexate	0.9978
135236	Omeprazole	Quetiapine	0.9978
133441	Nitrofurantoin	Pentoxifylline	0.9978
125354	Metronidazole	Minocycline	0.9978
18472	Atomoxetine	Sotalol	0.9978
109459	Isoproterenol	Methadone	0.9978
87444	Felodipine	Hydralazine	0.9978
6444	Allopurinol	Testosterone	0.9978
10715	Amiodarone	Topiramate	0.9978
113897	Leflunomide	Morphine	0.9978
6414	Allopurinol	Saquinavir	0.9978
127351	Mirtazapine	Oxybutynin	0.9978
149257	Topiramate	Triamcinolone	0.9978
110753	Ivermectin	Tadalafil	0.9978
123322	Methotrexate	Metronidazole	0.9978
93507	Flurbiprofen	Risperidone	0.9978
148183	Terazosin	Tizanidine	0.9978
144231	Quinapril	Selegiline	0.9978
25892	Betaxolol	Methadone	0.9978
102962	Hydralazine	Loxapine	0.9978
30078	Bosentan	Budesonide	0.9978
30397	Bosentan	Oxaprozin	0.9978
123427	Methotrexate	Propafenone	0.9978
144886	Remifentanil	Tizanidine	0.9978
30187	Bosentan	Entacapone	0.9978
99651	Gemifloxacin	Phenytoin	0.9978
122721	Methadone	Prazosin	0.9978
10523	Amiodarone	Methylphenidate	0.9978
34372	Bupropion	Tacrolimus	0.9978
37985	Carbamazepine	Levetiracetam	0.9978
21572	Azelastine	Topiramate	0.9978
101595	Guanfacine	Sotalol	0.9978
145819	Ritonavir	Testosterone	0.9978
59064	Clozapine	Irbesartan	0.9978
87292	Famotidine	Quinine	0.9978
90363	Fluconazole	Nortriptyline	0.9978
124158	Methylphenidate	Sulfisoxazole	0.9978
126983	Minocycline	Rabeprazole	0.9978
31320	Brimonidine	Mifepristone	0.9978
64617	Desflurane	Nimodipine	0.9978
35086	Cabergoline	Guanfacine	0.9978
15986	Aripiprazole	Azithromycin	0.9978
126264	Mifepristone	Nizatidine	0.9978
127468	Mirtazapine	Tiotropium	0.9978
101440	Guanfacine	Methadone	0.9978
120576	Meloxicam	Phenytoin	0.9978
122653	Methadone	Nadolol	0.9978
6471	Allopurinol	Treprostinil	0.9978
110338	Itraconazole	Mycophenolic Acid	0.9978
148853	Timolol	Topiramate	0.9978
142885	Progesterone	Ritonavir	0.9978
99864	Glimepiride	Mefloquine	0.9978
102980	Hydralazine	Methadone	0.9978
144352	Quinine	Tacrolimus	0.9978
106604	Imipramine	Morphine	0.9978
139879	Phenytoin	Prazosin	0.9978
108048	Irbesartan	Minocycline	0.9978
55872	Citalopram	Timolol	0.9978
10427	Amiodarone	Galantamine	0.9978
77952	Efavirenz	Imatinib	0.9978
129897	Mycophenolic Acid	Sertraline	0.9978
21781	Azithromycin	Fluvoxamine	0.9978
131859	Nelfinavir	Tamoxifen	0.9978
90348	Fluconazole	Nelfinavir	0.9978
93566	Flurbiprofen	Tramadol	0.9978
134993	Olanzapine	Voriconazole	0.9978
74919	Doxazosin	Leflunomide	0.9978
22111	Azithromycin	Ziprasidone	0.9978
113993	Leflunomide	Quetiapine	0.9978
146326	Saquinavir	Tacrolimus	0.9978
145689	Risedronate	Zidovudine	0.9978
137275	Paclitaxel	Tizanidine	0.9978
99593	Gemifloxacin	Nabilone	0.9978
122614	Metformin	Zidovudine	0.9978
92924	Fluoxetine	Zolpidem	0.9978
78913	Enalapril	Rivastigmine	0.9978
79531	Entacapone	Metoprolol	0.9978
132776	Nifedipine	Selegiline	0.9978
80731	Eprosartan	Phenytoin	0.9978
5973	Allopurinol	Amoxapine	0.9978
137588	Pantoprazole	Tiotropium	0.9978
148990	Tizanidine	Treprostinil	0.9978
133582	Nitrofurantoin	Warfarin	0.9978
118366	Loxapine	Pindolol	0.9978
132754	Nifedipine	Rabeprazole	0.9978
107868	Indomethacin	Quinine	0.9978
6072	Allopurinol	Clozapine	0.9978
90264	Fluconazole	Labetalol	0.9978
110273	Itraconazole	Levetiracetam	0.9978
145647	Risedronate	Timolol	0.9978
38866	Carnitine	Fosphenytoin	0.9978
36394	Capecitabine	Citalopram	0.9978
149820	Verapamil	Zidovudine	0.9978
16676	Arsenic Trioxide	Fluvoxamine	0.9978
96477	Fosphenytoin	Remifentanil	0.9978
75099	Doxazosin	Ropinirole	0.9978
30389	Bosentan	Olanzapine	0.9978
106886	Imiquimod	Minocycline	0.9978
70744	Diltiazem	Pramipexole	0.9978
129886	Mycophenolic Acid	Risedronate	0.9978
141580	Prazosin	Tizanidine	0.9978
78088	Efavirenz	Paclitaxel	0.9977
100196	Glipizide	Methylphenidate	0.9977
6286	Allopurinol	Mirtazapine	0.9977
133663	Nitroglycerin	Quinine	0.9977
122750	Methadone	Remifentanil	0.9977
17714	Atenolol	Galantamine	0.9977
15989	Aripiprazole	Baclofen	0.9977
116423	Lisinopril	Tiotropium	0.9977
112290	Labetalol	Nicardipine	0.9977
146603	Sertraline	Topiramate	0.9977
144229	Quinapril	Saquinavir	0.9977
63714	Delavirdine	Lisinopril	0.9977
30560	Bosentan	Ziprasidone	0.9977
70685	Diltiazem	Nelfinavir	0.9977
96574	Fosphenytoin	Zidovudine	0.9977
85772	Etoposide	Morphine	0.9977
144415	Quinine	Zidovudine	0.9977
99750	Gemifloxacin	Tizanidine	0.9977
145648	Risedronate	Tiotropium	0.9977
117918	Losartan	Selegiline	0.9977
117276	Loratadine	Mifepristone	0.9977
113518	Lansoprazole	Timolol	0.9977
126958	Minocycline	Prazosin	0.9977
22078	Azithromycin	Topiramate	0.9977
139950	Phenytoin	Terazosin	0.9977
132704	Nifedipine	Paroxetine	0.9977
99602	Gemifloxacin	Nelfinavir	0.9977
93399	Flurbiprofen	Nabilone	0.9977
30332	Bosentan	Methotrexate	0.9977
97874	Galantamine	Zolpidem	0.9977
118957	Maprotiline	Timolol	0.9977
21118	Azelastine	Bosentan	0.9977
141296	Pramipexole	Sumatriptan	0.9977
67369	Diazoxide	Imipramine	0.9977
75248	Doxepin	Furosemide	0.9977
121877	Meropenem	Topiramate	0.9977
97688	Galantamine	Nicardipine	0.9977
147718	Tacrolimus	Valproic Acid	0.9977
134413	Norfloxacin	Tadalafil	0.9977
25674	Betaxolol	Celecoxib	0.9977
70847	Diltiazem	Trazodone	0.9977
147497	Sulfisoxazole	Topiramate	0.9977
85790	Etoposide	Nifedipine	0.9977
106563	Imipramine	Mefloquine	0.9977
70552	Diltiazem	Galantamine	0.9977
55687	Citalopram	Methotrexate	0.9977
111716	Ketoprofen	Mirtazapine	0.9977
59342	Clozapine	Verapamil	0.9977
118300	Loxapine	Morphine	0.9977
55622	Citalopram	Imatinib	0.9977
148881	Timolol	Voriconazole	0.9977
30263	Bosentan	Ibuprofen	0.9977
18788	Atorvastatin	Labetalol	0.9977
26110	Betaxolol	Valproic Acid	0.9977
113848	Leflunomide	Lovastatin	0.9977
28878	Bisoprolol	Minocycline	0.9977
108028	Irbesartan	Metformin	0.9977
61321	Cysteamine	Pentoxifylline	0.9977
30237	Bosentan	Furosemide	0.9977
27466	Bicalutamide	Pentoxifylline	0.9977
113025	Lamotrigine	Leflunomide	0.9977
27332	Bicalutamide	Itraconazole	0.9977
37896	Carbamazepine	Famotidine	0.9977
80830	Eprosartan	Tizanidine	0.9977
116680	Lithium	Timolol	0.9977
9256	Aminoglutethimide	Cimetidine	0.9977
34108	Bupropion	Foscarnet	0.9977
127006	Minocycline	Sertraline	0.9977
38925	Carnitine	Leflunomide	0.9977
11377	Amlodipine	Clozapine	0.9977
149052	Tobramycin	Warfarin	0.9977
113458	Lansoprazole	Quinine	0.9977
18946	Atorvastatin	Propafenone	0.9977
129218	Morphine	Pantoprazole	0.9977
144165	Quetiapine	Tizanidine	0.9977
40090	Carvedilol	Tizanidine	0.9977
5986	Allopurinol	Atorvastatin	0.9977
146557	Selegiline	Zonisamide	0.9977
139917	Phenytoin	Risperidone	0.9977
131754	Nelfinavir	Orlistat	0.9977
146848	Sotalol	Treprostinil	0.9977
38038	Carbamazepine	Mirtazapine	0.9977
78815	Enalapril	Nicardipine	0.9977
90151	Flecainide	Tizanidine	0.9977
94878	Fluvoxamine	Testosterone	0.9977
30287	Bosentan	Ketorolac	0.9977
5981	Allopurinol	Aripiprazole	0.9977
87427	Felodipine	Galantamine	0.9977
17743	Atenolol	Imipramine	0.9977
67305	Diazoxide	Etoposide	0.9977
113998	Leflunomide	Ramipril	0.9977
98611	Gefitinib	Methylphenidate	0.9977
37268	Captopril	Topiramate	0.9977
119766	Mefenamic Acid	Metoprolol	0.9977
149781	Valsartan	Warfarin	0.9977
144883	Remifentanil	Timolol	0.9977
125479	Metronidazole	Rivastigmine	0.9977
30245	Bosentan	Gemifloxacin	0.9977
6325	Allopurinol	Olanzapine	0.9977
89981	Flecainide	Mirtazapine	0.9977
16903	Arsenic Trioxide	Quinine	0.9977
113040	Lamotrigine	Losartan	0.9977
55732	Citalopram	Nifedipine	0.9977
30451	Bosentan	Protriptyline	0.9977
137409	Pamidronate	Tacrolimus	0.9977
95116	Formoterol	Pentoxifylline	0.9977
127394	Mirtazapine	Progesterone	0.9977
137201	Paclitaxel	Propafenone	0.9977
30487	Bosentan	Stavudine	0.9977
120229	Mefloquine	Zidovudine	0.9977
37032	Captopril	Lamotrigine	0.9977
131541	Naproxen	Zolpidem	0.9977
14421	Anastrozole	Aripiprazole	0.9977
92768	Fluoxetine	Pantoprazole	0.9977
124113	Methylphenidate	Propofol	0.9977
110364	Itraconazole	Ofloxacin	0.9977
129284	Morphine	Risperidone	0.9977
87708	Felodipine	Tizanidine	0.9977
112294	Labetalol	Nimodipine	0.9977
127303	Mirtazapine	Modafinil	0.9977
39932	Carvedilol	Mycophenolic Acid	0.9977
74864	Doxazosin	Galantamine	0.9977
70872	Diltiazem	Zidovudine	0.9977
6183	Allopurinol	Glipizide	0.9977
112366	Labetalol	Protriptyline	0.9977
8013	Amifostine	Ropivacaine	0.9977
30386	Bosentan	Norfloxacin	0.9977
147860	Tamoxifen	Ziprasidone	0.9977
127842	Mitoxantrone	Risperidone	0.9977
146402	Secobarbital	Sufentanil	0.9977
123362	Methotrexate	Nitrofurantoin	0.9977
10747	Amiodarone	Zidovudine	0.9977
39706	Carvedilol	Clozapine	0.9977
19050	Atorvastatin	Venlafaxine	0.9977
70783	Diltiazem	Risedronate	0.9977
82020	Esmolol	Foscarnet	0.9977
28713	Bisoprolol	Efavirenz	0.9977
121870	Meropenem	Tizanidine	0.9977
139015	Pentoxifylline	Polythiazide	0.9977
106819	Imiquimod	Itraconazole	0.9977
16374	Aripiprazole	Progesterone	0.9977
130031	Nabilone	Perindopril	0.9977
145984	Ropinirole	Tacrolimus	0.9977
59007	Clozapine	Flecainide	0.9977
80828	Eprosartan	Tiotropium	0.9977
112458	Labetalol	Trimipramine	0.9976
93597	Flurbiprofen	Zolpidem	0.9976
126928	Minocycline	Paclitaxel	0.9976
147771	Tadalafil	Treprostinil	0.9976
18079	Atomoxetine	Carnitine	0.9976
93482	Flurbiprofen	Propafenone	0.9976
137672	Paricalcitol	Propafenone	0.9976
30446	Bosentan	Propafenone	0.9976
87706	Felodipine	Tiotropium	0.9976
135196	Omeprazole	Pentoxifylline	0.9976
114073	Leflunomide	Treprostinil	0.9976
129889	Mycophenolic Acid	Rivastigmine	0.9976
95132	Formoterol	Pramipexole	0.9976
141247	Pramipexole	Propafenone	0.9976
59001	Clozapine	Fenofibrate	0.9976
131922	Nelfinavir	Zolpidem	0.9976
37213	Captopril	Ritonavir	0.9976
58958	Clozapine	Disopyramide	0.9976
123495	Methotrexate	Tiagabine	0.9976
102097	Haloperidol	Nalbuphine	0.9976
2113	Acetazolamide	Sulfisoxazole	0.9976
129488	Moxifloxacin	Rivastigmine	0.9976
145832	Ritonavir	Tobramycin	0.9976
115488	Lidocaine	Nabilone	0.9976
30272	Bosentan	Indomethacin	0.9976
129372	Morphine	Zidovudine	0.9976
16750	Arsenic Trioxide	Lithium	0.9976
125217	Metoprolol	Pravastatin	0.9976
125147	Metoprolol	Mycophenolic Acid	0.9976
97617	Galantamine	Lithium	0.9976
18505	Atomoxetine	Timolol	0.9976
135261	Omeprazole	Selegiline	0.9976
149526	Treprostinil	Zolpidem	0.9976
21886	Azithromycin	Methylphenidate	0.9976
25994	Betaxolol	Pramipexole	0.9976
143481	Propranolol	Sulfisoxazole	0.9976
128141	Modafinil	Zolpidem	0.9976
128135	Modafinil	Voriconazole	0.9976
55917	Citalopram	Zonisamide	0.9976
134540	Nortriptyline	Propranolol	0.9976
145780	Risperidone	Zidovudine	0.9976
18070	Atomoxetine	Buspirone	0.9976
78829	Enalapril	Olanzapine	0.9976
96385	Fosphenytoin	Naproxen	0.9976
63819	Delavirdine	Paroxetine	0.9976
18931	Atorvastatin	Pramipexole	0.9976
95566	Foscarnet	Treprostinil	0.9976
70672	Diltiazem	Morphine	0.9976
70631	Diltiazem	Mefloquine	0.9976
139087	Pentoxifylline	Temazepam	0.9976
22048	Azithromycin	Tadalafil	0.9976
40565	Cefaclor	Topiramate	0.9976
59266	Clozapine	Ropivacaine	0.9976
55160	Ciprofloxacin	Galantamine	0.9976
149272	Topiramate	Verapamil	0.9976
105105	Ibuprofen	Metoprolol	0.9976
131776	Nelfinavir	Pentoxifylline	0.9976
64931	Desipramine	Itraconazole	0.9976
39046	Carnitine	Pentoxifylline	0.9976
59326	Clozapine	Treprostinil	0.9976
36490	Capecitabine	Fluoxetine	0.9976
7951	Amifostine	Pentazocine	0.9976
36628	Capecitabine	Mycophenolic Acid	0.9976
65406	Desloratadine	Mifepristone	0.9976
39794	Carvedilol	Fluoxetine	0.9976
24929	Benazepril	Nabilone	0.9976
18071	Atomoxetine	Cabergoline	0.9976
117916	Losartan	Saquinavir	0.9976
12313	Amoxapine	Valproic Acid	0.9976
78098	Efavirenz	Pentazocine	0.9976
122652	Methadone	Nabumetone	0.9976
143180	Propafenone	Trazodone	0.9976
10275	Amiodarone	Captopril	0.9976
18365	Atomoxetine	Nifedipine	0.9976
21326	Azelastine	Itraconazole	0.9976
135512	Ondansetron	Zolpidem	0.9976
1158	Acebutolol	Buspirone	0.9976
71754	Disopyramide	Haloperidol	0.9976
34437	Bupropion	Zolpidem	0.9976
135408	Ondansetron	Quinine	0.9976
105056	Ibuprofen	Lamotrigine	0.9976
122737	Methadone	Propranolol	0.9976
16778	Arsenic Trioxide	Methotrexate	0.9976
116492	Lithium	Methadone	0.9976
30114	Bosentan	Cetirizine	0.9976
117912	Losartan	Ropinirole	0.9976
106314	Imatinib	Nabilone	0.9976
113898	Leflunomide	Moxifloxacin	0.9976
37935	Carbamazepine	Glipizide	0.9976
51082	Chlorothiazide	Warfarin	0.9976
125536	Metronidazole	Tramadol	0.9976
130109	Nabilone	Sulindac	0.9976
30150	Bosentan	Desipramine	0.9976
59088	Clozapine	Levetiracetam	0.9976
79482	Entacapone	Lamotrigine	0.9976
88014	Fenofibrate	Ropinirole	0.9976
132484	Nicardipine	Zidovudine	0.9976
78708	Enalapril	Imipramine	0.9976
34828	Buspirone	Ritonavir	0.9976
16255	Aripiprazole	Meropenem	0.9976
10479	Amiodarone	Lamotrigine	0.9976
7952	Amifostine	Pentobarbital	0.9976
37781	Carbamazepine	Carvedilol	0.9976
87499	Felodipine	Loxapine	0.9976
139033	Pentoxifylline	Propofol	0.9976
6892	Amantadine	Phenytoin	0.9976
127471	Mirtazapine	Tobramycin	0.9976
54384	Cimetidine	Methyldopa	0.9976
132855	Nifedipine	Zidovudine	0.9976
123509	Methotrexate	Topotecan	0.9976
16877	Arsenic Trioxide	Pramipexole	0.9976
96934	Furosemide	Imipramine	0.9976
37222	Captopril	Sertraline	0.9976
116267	Lisinopril	Mycophenolic Acid	0.9976
149280	Topiramate	Zidovudine	0.9976
14894	Anastrozole	Tiotropium	0.9976
84931	Etodolac	Fosphenytoin	0.9976
123385	Methotrexate	Pamidronate	0.9976
110401	Itraconazole	Pindolol	0.9976
34170	Bupropion	Leflunomide	0.9976
121685	Meropenem	Methylphenidate	0.9976
139027	Pentoxifylline	Prochlorperazine	0.9976
111838	Ketoprofen	Ritonavir	0.9976
30839	Bretylium	Mitotane	0.9976
135407	Ondansetron	Quinapril	0.9976
114011	Leflunomide	Rivastigmine	0.9976
141348	Pramipexole	Valproic Acid	0.9976
83343	Ethacrynic Acid	Quinine	0.9976
12058	Amoxapine	Lansoprazole	0.9976
18998	Atorvastatin	Tamoxifen	0.9976
127467	Mirtazapine	Timolol	0.9976
87306	Famotidine	Risperidone	0.9976
96051	Fosinopril	Nabilone	0.9976
110379	Itraconazole	Paclitaxel	0.9976
107403	Indinavir	Ivermectin	0.9976
34870	Buspirone	Tiagabine	0.9976
97868	Galantamine	Voriconazole	0.9976
138927	Pentobarbital	Sufentanil	0.9976
97564	Galantamine	Guanfacine	0.9976
103571	Hydroflumethiazide	Loxapine	0.9976
34883	Buspirone	Topiramate	0.9976
139031	Pentoxifylline	Propafenone	0.9976
28880	Bisoprolol	Mirtazapine	0.9976
124891	Metoclopramide	Verapamil	0.9976
64938	Desipramine	Labetalol	0.9976
108328	Irinotecan	Metoprolol	0.9976
55393	Ciprofloxacin	Ritonavir	0.9976
126918	Minocycline	Orlistat	0.9976
133076	Nimodipine	Pentazocine	0.9976
110363	Itraconazole	Nortriptyline	0.9976
59077	Clozapine	Ketoprofen	0.9976
132814	Nifedipine	Tiotropium	0.9976
131854	Nelfinavir	Sulfisoxazole	0.9976
131411	Naproxen	Pramipexole	0.9976
87748	Felodipine	Ziprasidone	0.9976
79669	Entacapone	Saquinavir	0.9976
125124	Metolazone	Zolpidem	0.9976
14386	Anagrelide	Tramadol	0.9976
94929	Fluvoxamine	Zidovudine	0.9975
97970	Ganciclovir	Methylphenidate	0.9975
32275	Bromocriptine	Methadone	0.9975
18220	Atomoxetine	Foscarnet	0.9975
139227	Perindopril	Tacrolimus	0.9975
110526	Itraconazole	Venlafaxine	0.9975
149525	Treprostinil	Ziprasidone	0.9975
99857	Glimepiride	Loxapine	0.9975
113147	Lamotrigine	Perindopril	0.9975
123452	Methotrexate	Risperidone	0.9975
25954	Betaxolol	Omeprazole	0.9975
54287	Cimetidine	Furosemide	0.9975
126971	Minocycline	Propafenone	0.9975
125203	Metoprolol	Phenelzine	0.9975
31310	Brimonidine	Methylphenidate	0.9975
74973	Doxazosin	Minocycline	0.9975
123437	Methotrexate	Quinapril	0.9975
127338	Mirtazapine	Ofloxacin	0.9975
137226	Paclitaxel	Risperidone	0.9975
58981	Clozapine	Eprosartan	0.9975
113063	Lamotrigine	Methotrexate	0.9975
54188	Cimetidine	Cyclobenzaprine	0.9975
110301	Itraconazole	Meropenem	0.9975
118403	Loxapine	Remifentanil	0.9975
16132	Aripiprazole	Etodolac	0.9975
94370	Fluvastatin	Methotrexate	0.9975
18634	Atorvastatin	Clonidine	0.9975
95163	Formoterol	Remifentanil	0.9975
129570	Moxifloxacin	Voriconazole	0.9975
122641	Methadone	Modafinil	0.9975
129831	Mycophenolic Acid	Pentoxifylline	0.9975
19383	Atovaquone	Nelfinavir	0.9975
139082	Pentoxifylline	Tadalafil	0.9975
131736	Nelfinavir	Nicardipine	0.9975
120160	Mefloquine	Sulfadiazine	0.9975
131921	Nelfinavir	Ziprasidone	0.9975
120226	Mefloquine	Warfarin	0.9975
7692	Amifostine	Dexmedetomidine	0.9975
38489	Carbinoxamine	Methadone	0.9975
83352	Ethacrynic Acid	Rifabutin	0.9975
129330	Morphine	Timolol	0.9975
127485	Mirtazapine	Treprostinil	0.9975
19359	Atovaquone	Minocycline	0.9975
139209	Perindopril	Saquinavir	0.9975
100358	Glipizide	Tadalafil	0.9975
113117	Lamotrigine	Norfloxacin	0.9975
65071	Desipramine	Phenytoin	0.9975
132744	Nifedipine	Propofol	0.9975
95403	Foscarnet	Nelfinavir	0.9975
78165	Efavirenz	Selegiline	0.9975
110340	Itraconazole	Nabumetone	0.9975
99727	Gemifloxacin	Tadalafil	0.9975
28619	Bisoprolol	Carbamazepine	0.9975
[truncated: 3,893 more rows]
